# Supplementary material for: Heterolytic Si−H Bond Cleavage at a Molybdenum‐Oxido‐Based Lewis Pair
Source: PubMed Central journal article supplement (PMC6001527; doi:10.1002/chem.201800226), 2018-04-27
Supplement: CHEM-24-7149-s001.pdf [file CHEM-24-7149-s001.pdf]

# CHEMISTRY

## A **European** Journal

### Supporting Information

#### **Heterolytic Si–H Bond Cleavage at a Molybdenum-Oxido-Based Lewis Pair**

Niklas Zwettler, Simon P. Walg, Ferdinand Belaj, and Nadia C. Mösch-Zanetti\*<sup>[a]</sup>

chem\_201800226\_sm\_miscellaneous\_information.pdf

## Content

|                                                                                                                                                                                                      |          |
|------------------------------------------------------------------------------------------------------------------------------------------------------------------------------------------------------|----------|
| <b>Supplementary figures</b> .....                                                                                                                                                                   | <b>3</b> |
| <b>Figure S1.</b> $^{19}\text{F}$ NMR spectra of the concentration dependent equilibrium of <b>2</b> (●) with $\text{MeCN}\cdot\text{B}(\text{C}_6\text{F}_5)_3$ (□) in $\text{C}_6\text{D}_6$ ..... | 3        |
| <b>Figure S2.</b> IR spectra of compounds <b>1</b> , $^{[1]}$ <b>2</b> and <b>3a</b> in the region from 350 to 3500 $\text{cm}^{-1}$ . ...                                                           | 4        |
| <b>Figure S3.</b> Scan rate dependence of the redox couples assigned to Mo(VI)/Mo(V) for complex <b>2</b> (left), <b>3a</b> (middle) and <b>3c</b> (right).....                                      | 4        |
| <b>Figure S4.</b> $^{19}\text{F}$ NMR spectra of the reaction of <b>3a</b> with benzaldehyde in $\text{C}_6\text{D}_6$ . ....                                                                        | 4        |
| <b>Figure S5.</b> $^1\text{H}$ NMR spectra of the reaction of <b>3a</b> with benzaldehyde in $\text{C}_6\text{D}_6$ . ....                                                                           | 5        |
| <b>Figure S6.</b> $^{19}\text{F}$ NMR spectra of the reaction of <b>3a</b> with benzaldehyde in $\text{CD}_2\text{Cl}_2$ . ....                                                                      | 5        |
| <b>Figure S7.</b> $^1\text{H}$ NMR spectra of the reaction of <b>3a</b> with benzaldehyde in $\text{CD}_2\text{Cl}_2$ .....                                                                          | 6        |
| <b>Figure S8.</b> $^{11}\text{B}$ NMR spectrum of <b>Int 3a'</b> from the reaction of <b>3a</b> with benzaldehyde in $\text{CD}_2\text{Cl}_2$ after 24 h.....                                        | 6        |
| <b>Figure S9.</b> Superimposed $^1\text{H}$ NMR spectra of <b>Int 3a'</b> and <b>Int 3a'-d<sub>1</sub></b> .....                                                                                     | 7        |
| <b>Figure S10.</b> $^{13}\text{C}$ NMR spectrum of <b>Int 3a'-d<sub>1</sub></b> .....                                                                                                                | 7        |
| <b>NMR and MS spectra of the compounds</b> .....                                                                                                                                                     | <b>8</b> |
| <b>Figure S11.</b> $^1\text{H}$ NMR spectrum of complex <b>2</b> in $\text{CD}_2\text{Cl}_2$ . ....                                                                                                  | 8        |
| <b>Figure S12.</b> $^{11}\text{B}$ NMR spectrum of complex <b>2</b> in $\text{CD}_2\text{Cl}_2$ . ....                                                                                               | 8        |
| <b>Figure S13.</b> $^{13}\text{C}$ NMR spectrum of complex <b>2</b> in $\text{CD}_2\text{Cl}_2$ . ....                                                                                               | 9        |
| <b>Figure S14.</b> $^{19}\text{F}$ NMR spectrum of complex <b>2</b> in $\text{CD}_2\text{Cl}_2$ .....                                                                                                | 9        |
| <b>Figure S15.</b> $^1\text{H}$ NMR spectrum of complex <b>3a</b> in $\text{CD}_2\text{Cl}_2$ . ....                                                                                                 | 10       |
| <b>Figure S16.</b> $^{11}\text{B}$ NMR spectrum of complex <b>3a</b> in $\text{CD}_2\text{Cl}_2$ . ....                                                                                              | 10       |
| <b>Figure S17.</b> $^{11}\text{B}$ NMR spectrum of complex <b>3a-d<sub>1</sub></b> in $\text{CD}_2\text{Cl}_2$ .....                                                                                 | 11       |
| <b>Figure S18.</b> $^{13}\text{C}$ NMR spectrum of complex <b>3a</b> in $\text{CD}_2\text{Cl}_2$ . ....                                                                                              | 11       |
| <b>Figure S19.</b> $^{19}\text{F}$ NMR spectrum of complex <b>3a</b> in $\text{CD}_2\text{Cl}_2$ .....                                                                                               | 12       |
| <b>Figure S20.</b> $^1\text{H}$ NMR spectrum of complex <b>3b</b> in $\text{CD}_2\text{Cl}_2$ . ....                                                                                                 | 12       |
| <b>Figure S21.</b> $^{11}\text{B}$ NMR spectrum of complex <b>3b</b> in $\text{CD}_2\text{Cl}_2$ . ....                                                                                              | 13       |
| <b>Figure S22.</b> $^{13}\text{C}$ NMR spectrum of complex <b>3b</b> in $\text{CD}_2\text{Cl}_2$ . ....                                                                                              | 13       |
| <b>Figure S23.</b> $^{19}\text{F}$ NMR spectrum of complex <b>3b</b> in $\text{CD}_2\text{Cl}_2$ . ....                                                                                              | 14       |
| <b>Figure S24.</b> $^1\text{H}$ NMR spectrum of complex <b>3c</b> in $\text{CD}_2\text{Cl}_2$ . ....                                                                                                 | 14       |
| <b>Figure S25.</b> $^{13}\text{C}$ NMR spectrum of complex <b>3c</b> in $\text{CD}_2\text{Cl}_2$ . ....                                                                                              | 15       |
| <b>Figure S26.</b> $^{19}\text{F}$ NMR spectrum of complex <b>3c</b> in $\text{CD}_2\text{Cl}_2$ .....                                                                                               | 15       |
| <b>Figure S27.</b> $^1\text{H}$ NMR spectrum of complex <b>4a</b> in $\text{CD}_2\text{Cl}_2$ . ....                                                                                                 | 16       |
| <b>Figure S28.</b> $^{13}\text{C}$ NMR spectrum of complex <b>4a</b> in $\text{CD}_2\text{Cl}_2$ . ....                                                                                              | 16       |
| <b>Figure S29.</b> $^{19}\text{F}$ NMR spectrum of complex <b>4a</b> in $\text{CD}_2\text{Cl}_2$ .....                                                                                               | 17       |
| <b>Figure S30.</b> $^1\text{H}$ NMR spectrum of complex <b>4b</b> in $\text{CD}_2\text{Cl}_2$ . ....                                                                                                 | 17       |

|                                                                                                                                                                             |           |
|-----------------------------------------------------------------------------------------------------------------------------------------------------------------------------|-----------|
| <b>Figure S31.</b> $^{11}\text{B}$ NMR spectrum of complex <b>4b</b> in $\text{CD}_2\text{Cl}_2$ .                                                                          | 18        |
| <b>Figure S32.</b> $^{13}\text{C}$ NMR spectrum of complex <b>4b</b> in $\text{CD}_2\text{Cl}_2$ .                                                                          | 18        |
| <b>Figure S33.</b> $^{19}\text{F}$ NMR spectrum of complex <b>4b</b> in $\text{CD}_2\text{Cl}_2$ .                                                                          | 19        |
| <b>Figure S34.</b> ESI-MS (positive mode) spectrum for <b>3a</b> , showing the peak for $[\text{Mo}(\text{OSiEt}_3)(\text{NfBu})]^+$ with the correct isotope pattern.      | 19        |
| <b>Figure S35.</b> ESI-MS (negative mode) spectrum for <b>3a</b> , showing peaks for $[\text{HB}(\text{C}_6\text{F}_5)_3]^-$ and $[\text{HOB}(\text{C}_6\text{F}_5)_3]^-$ . | 20        |
| <b>Figure S36.</b> ESI-MS (positive mode) spectrum for <b>3b</b> , showing the peak for $[\text{Mo}(\text{OSiPh}_3)(\text{NfBu})]^+$ with the correct isotope pattern.      | 20        |
| <b>Figure S37.</b> ESI-MS (negative mode) spectrum for <b>3b</b> , showing the peak for $[\text{HB}(\text{C}_6\text{F}_5)_3]^-$ .                                           | 21        |
| <b>Figure S38.</b> ESI-MS (positive mode) spectrum for <b>4b</b> , showing the peak for $[\text{Mo}(\text{OSiPh}_3)(\text{NfBu})]^+$ with the correct isotope pattern.      | 21        |
| <b>Figure S39.</b> ESI-MS (negative mode) spectrum for <b>4b</b> , showing a peak for $[\text{FB}(\text{C}_6\text{F}_5)_3]^-$ .                                             | 22        |
| <b>Electrochemistry data of the compounds</b>                                                                                                                               | <b>22</b> |
| <b>Figure S40.</b> Full sweep-width cyclic voltammogram of complex <b>1</b> <sup>[1]</sup> in MeCN.                                                                         | 22        |
| <b>Figure S41.</b> Full sweep-width cyclic voltammogram of complex <b>2</b> in $\text{CH}_2\text{Cl}_2$ .                                                                   | 23        |
| <b>Figure S42.</b> Full sweep-width cyclic voltammogram of complex <b>3a</b> in MeCN.                                                                                       | 23        |
| <b>Figure S43.</b> Full sweep-width cyclic voltammogram of complex <b>3b</b> in MeCN.                                                                                       | 23        |
| <b>Figure S44.</b> Full sweep-width cyclic voltammogram of complex <b>3c</b> in MeCN.                                                                                       | 24        |
| <b>Crystallographic data for 2 and 4b</b>                                                                                                                                   | <b>25</b> |
| <b>Crystal structure determination of 2</b>                                                                                                                                 | 25        |
| <b>Figure S45.</b> Stereoscopic ORTEP <sup>[5]</sup> plot of <b>2</b>                                                                                                       | 25        |
| <b>Table S1.</b> Crystal data and structure refinement for <b>2</b> (CCDC deposition number: 1574332)                                                                       | 26        |
| <b>Table S2.</b> Selected bond lengths [ $\text{\AA}$ ] and angles [ $^\circ$ ] for <b>2</b> .                                                                              | 27        |
| <b>Crystal structure determination of 4b</b>                                                                                                                                | 27        |
| <b>Figure S46.</b> Stereoscopic ORTEP <sup>[5]</sup> plot of the complex cation found in <b>4b</b>                                                                          | 28        |
| <b>Figure S47.</b> Stereoscopic ORTEP <sup>[5]</sup> plot of <b>4b</b>                                                                                                      | 28        |
| <b>Table S3.</b> Crystal data and structure refinement for <b>4b</b> (CCDC deposition number: 1574333)                                                                      | 29        |
| <b>Table S4.</b> Selected bond lengths [ $\text{\AA}$ ] and angles [ $^\circ$ ] for <b>4b</b> .                                                                             | 30        |
| <b>References</b>                                                                                                                                                           | <b>30</b> |

## Supplementary figures

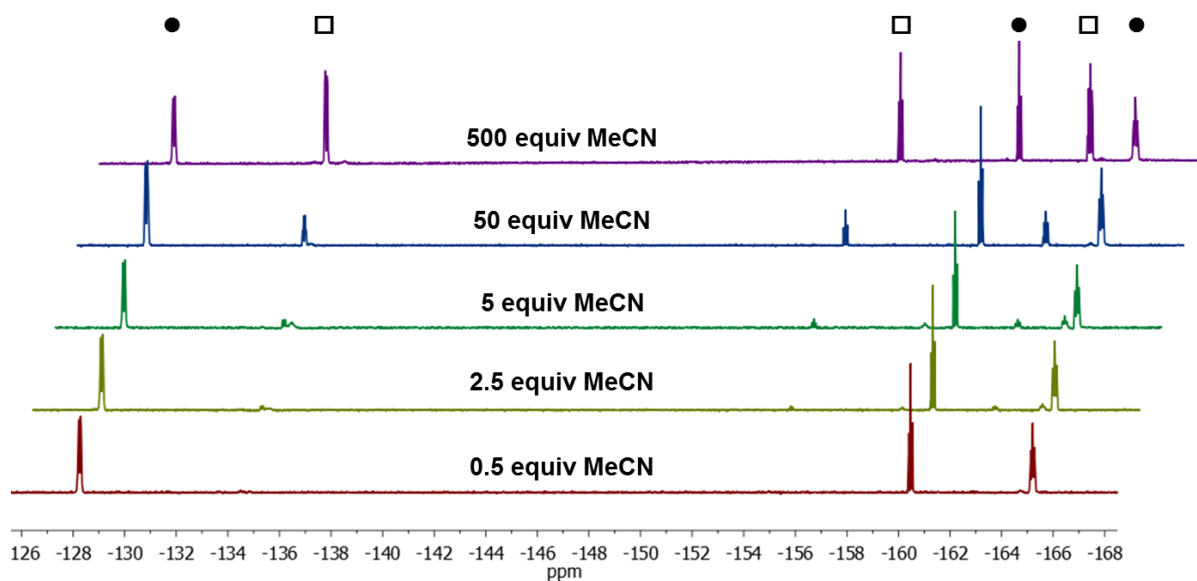

**Figure S1.**  $^{19}\text{F}$  NMR spectra of the concentration dependent equilibrium of **2** (●) with  $\text{MeCN}\cdot\text{B}(\text{C}_6\text{F}_5)_3$  (□) in  $\text{C}_6\text{D}_6$ .

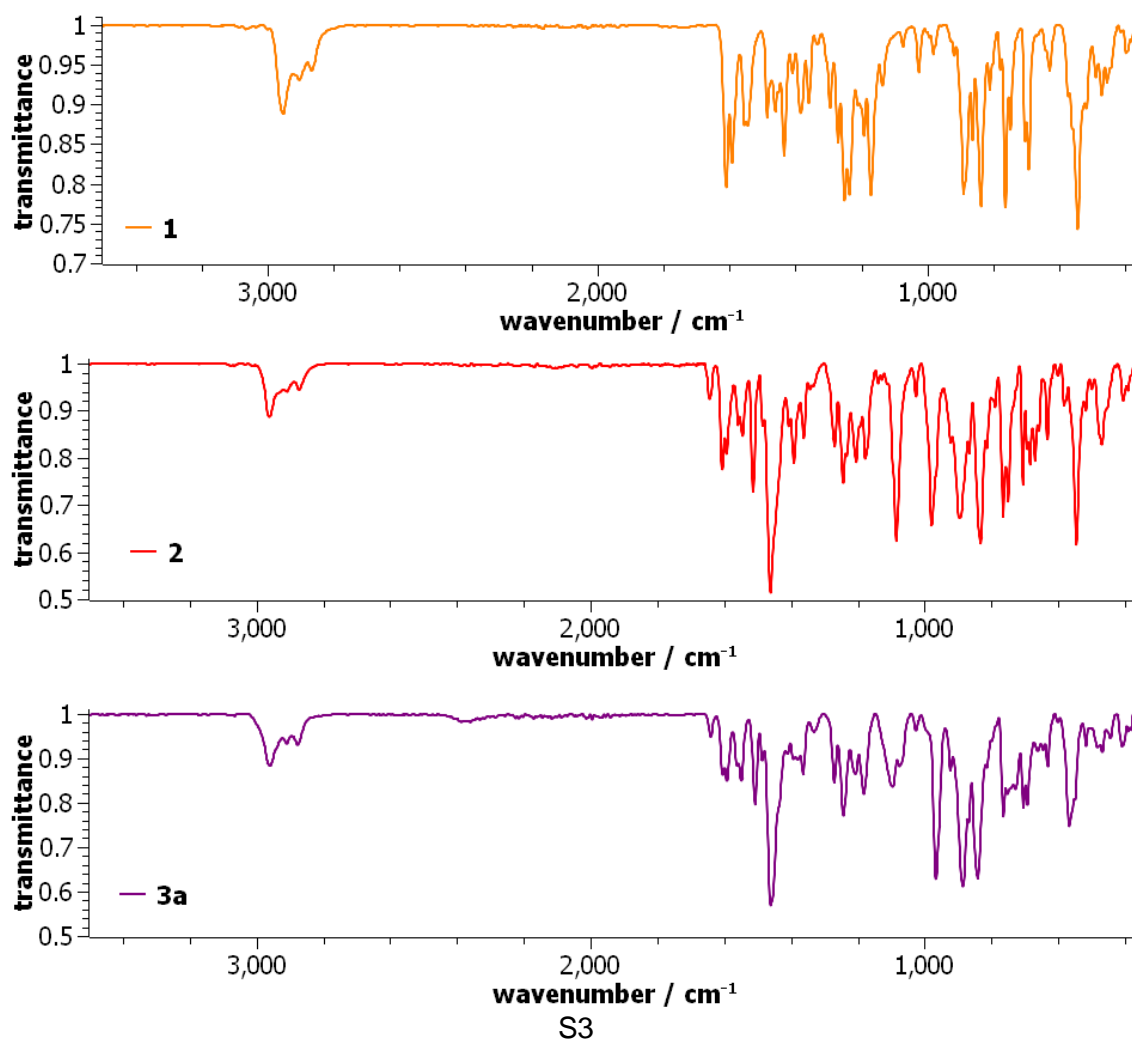

**Figure S2.** IR spectra of compounds **1**,<sup>[1]</sup> **2** and **3a** in the region from 350 to 3500  $\text{cm}^{-1}$ .

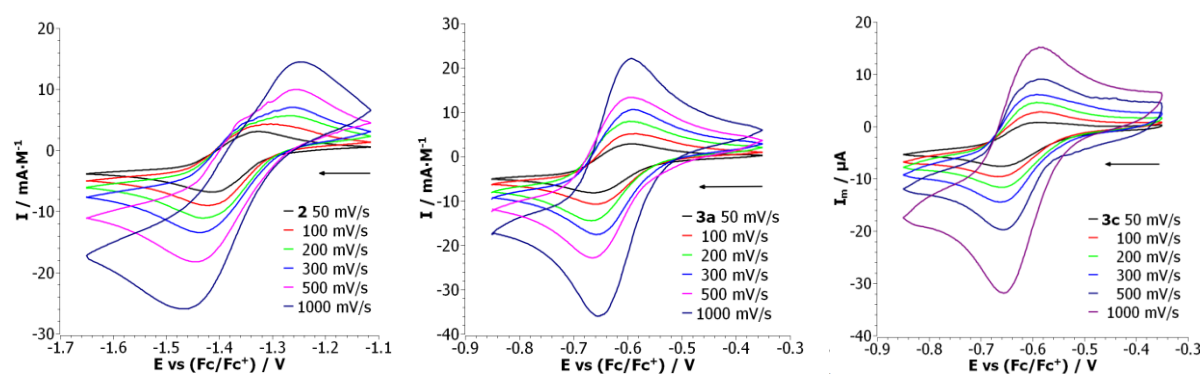

**Figure S3.** Scan rate dependence of the redox couples assigned to Mo(VI)/Mo(V) for complex **2** (left), **3a** (middle) and **3c** (right).

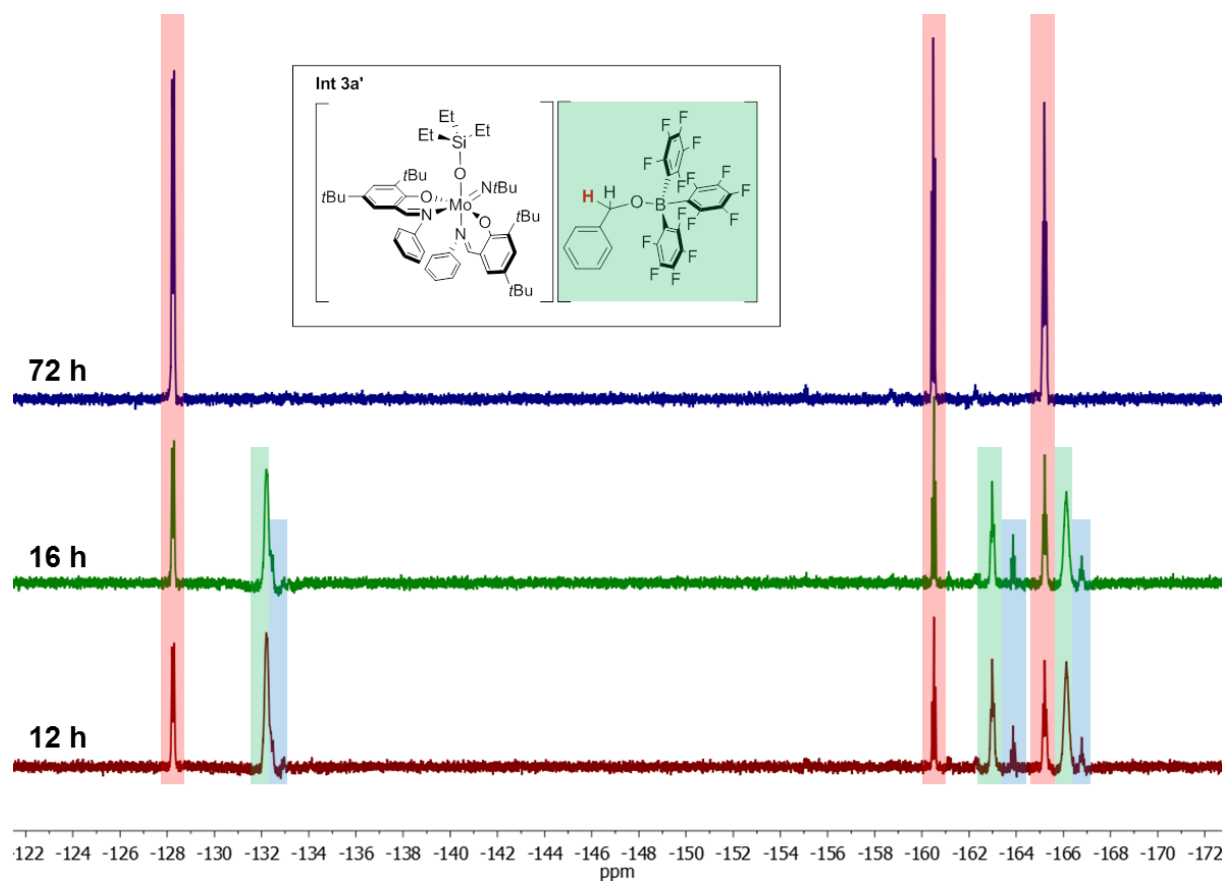

**Figure S4.**  $^{19}\text{F}$  NMR spectra of the reaction of **3a** with benzaldehyde in  $\text{C}_6\text{D}_6$ . The red boxes mark the resonances for the Lewis adduct **2**, the blue boxes mark residual  $[\text{HB}(\text{C}_6\text{F}_5)_3]^-$  from **3a** and the resonances in the green boxes correspond to the anion of the intermediate species **Int 3a'**.

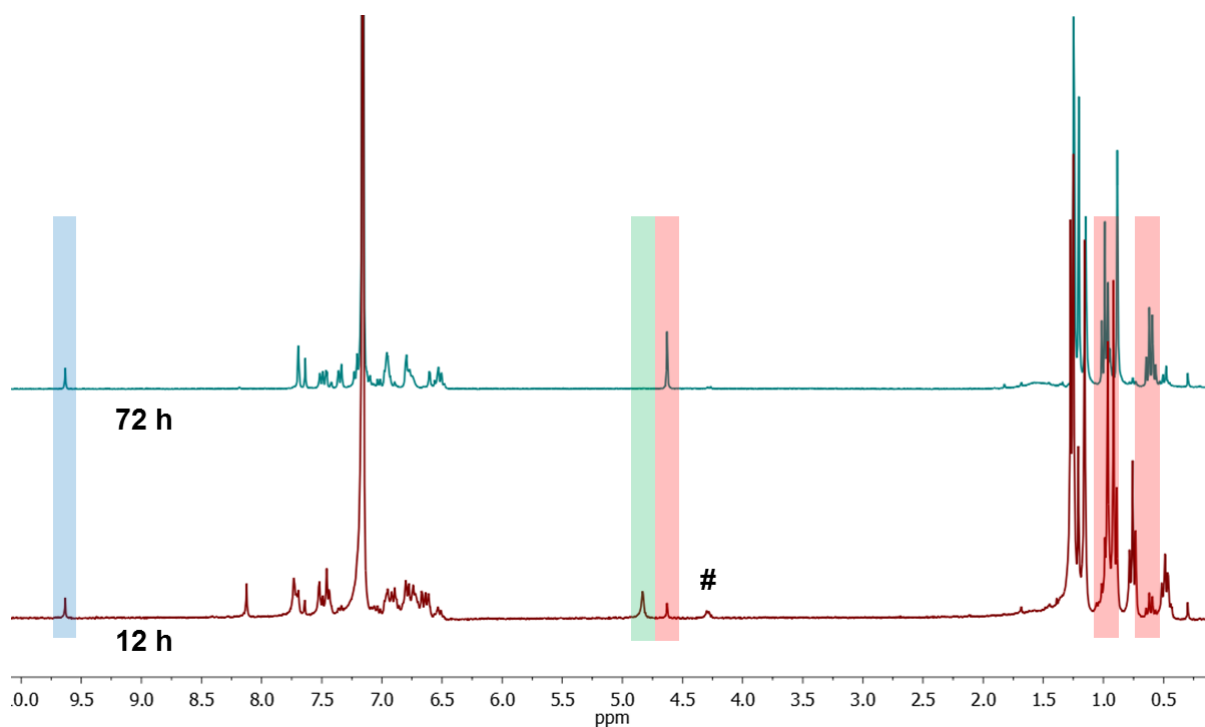

**Figure S5.**  $^1\text{H}$  NMR spectra of the reaction of **3a** with benzaldehyde in  $\text{C}_6\text{D}_6$ . The red boxes correspond to  $\text{Bn-OSiEt}_3$ , the blue box refers to residual benzaldehyde and the # symbols correspond to  $\text{Bn-OH}$  impurity. The resonance in the green box corresponds to the intermediate species **Int 3a'**.

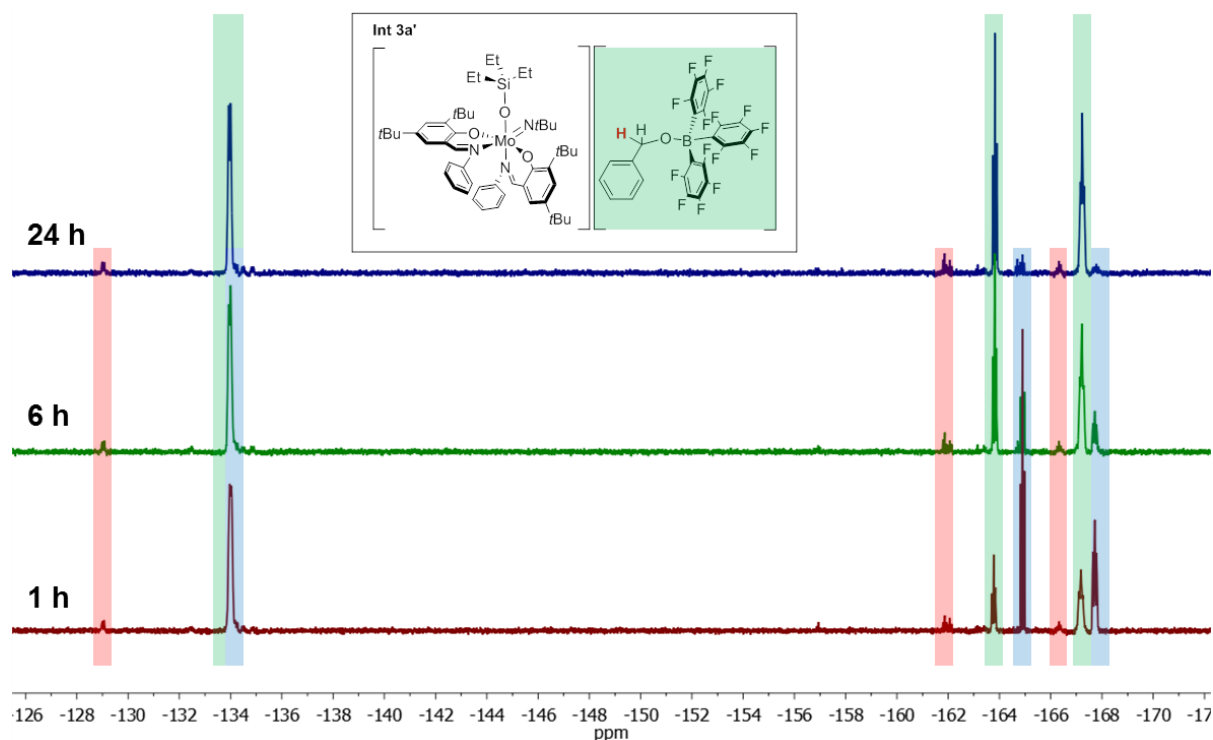

**Figure S6.**  $^{19}\text{F}$  NMR spectra of the reaction of **3a** with benzaldehyde in  $\text{CD}_2\text{Cl}_2$ . The blue boxes mark the resonances for the  $[\text{HB}(\text{C}_6\text{F}_5)_3]^-$  anion of the initial complex **3a** and the resonances in the green boxes correspond to the intermediate species **Int 3a'**, consistent to literature.<sup>[2]</sup> Lewis adduct **2** is only formed in minute quantities, marked with the red boxes.

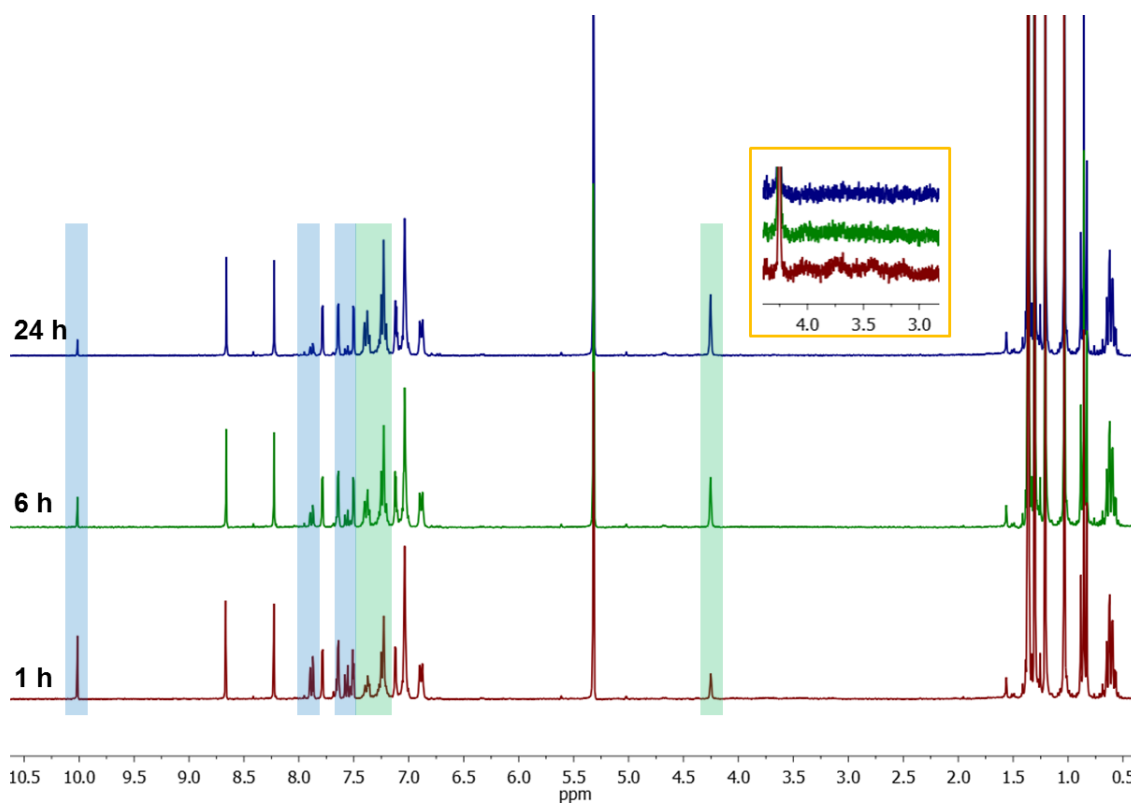

**Figure S7.**  $^1\text{H}$  NMR spectra of the reaction of **3a** with benzaldehyde in  $\text{CD}_2\text{Cl}_2$ . The resonances in the green boxes correspond to the intermediate species **Int 3a'**, the blue boxes refer to residual benzaldehyde and the yellow box shows the decrease of the B–H resonance. No formation of complex **2** or  $\text{Bn-O-SiEt}_3$  is observed within 24 h of reaction time, after 72 h, the conversion is  $\sim 5\%$ .

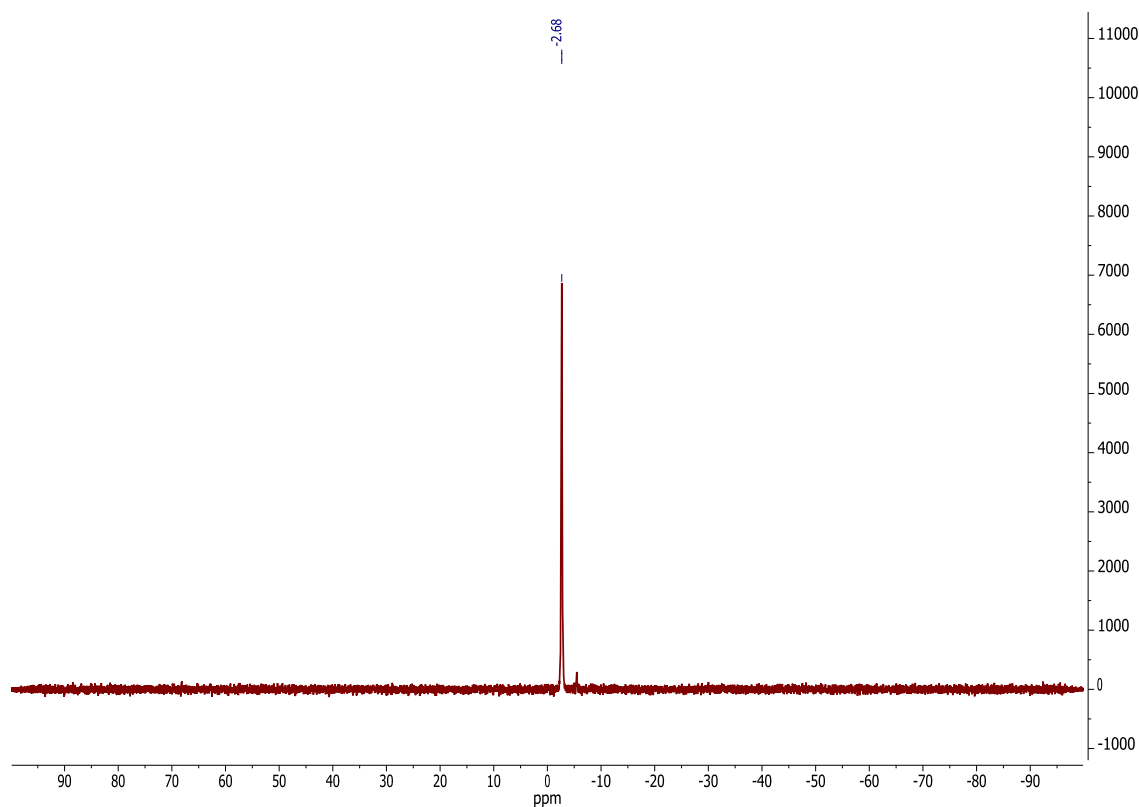

**Figure S8.**  $^{11}\text{B}$  NMR spectrum of **Int 3a'** from the reaction of **3a** with benzaldehyde in  $\text{CD}_2\text{Cl}_2$  after 24 h.

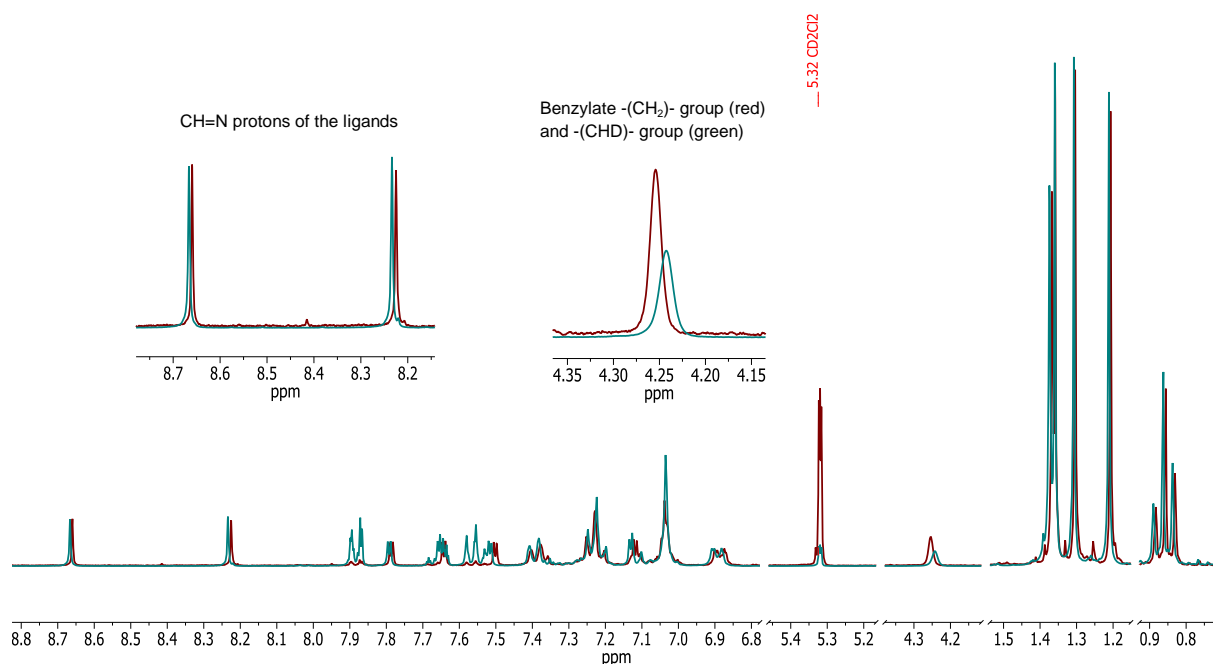

**Figure S9.** Superimposed  $^1\text{H}$  NMR spectra of **Int 3a'** and **Int 3a'-d<sub>1</sub>** showing the different peak areas for the benzylate methylene group; Red: **Int 3a'**,  $-(\text{CH}_2)-$  group integrates for two protons, Green: **Int 3a'-d<sub>1</sub>**,  $-(\text{CHD})-$  group integrates for one proton. Additional signals in the spectrum of **Int 3a'-d<sub>1</sub>** correspond to excess benzaldehyde.

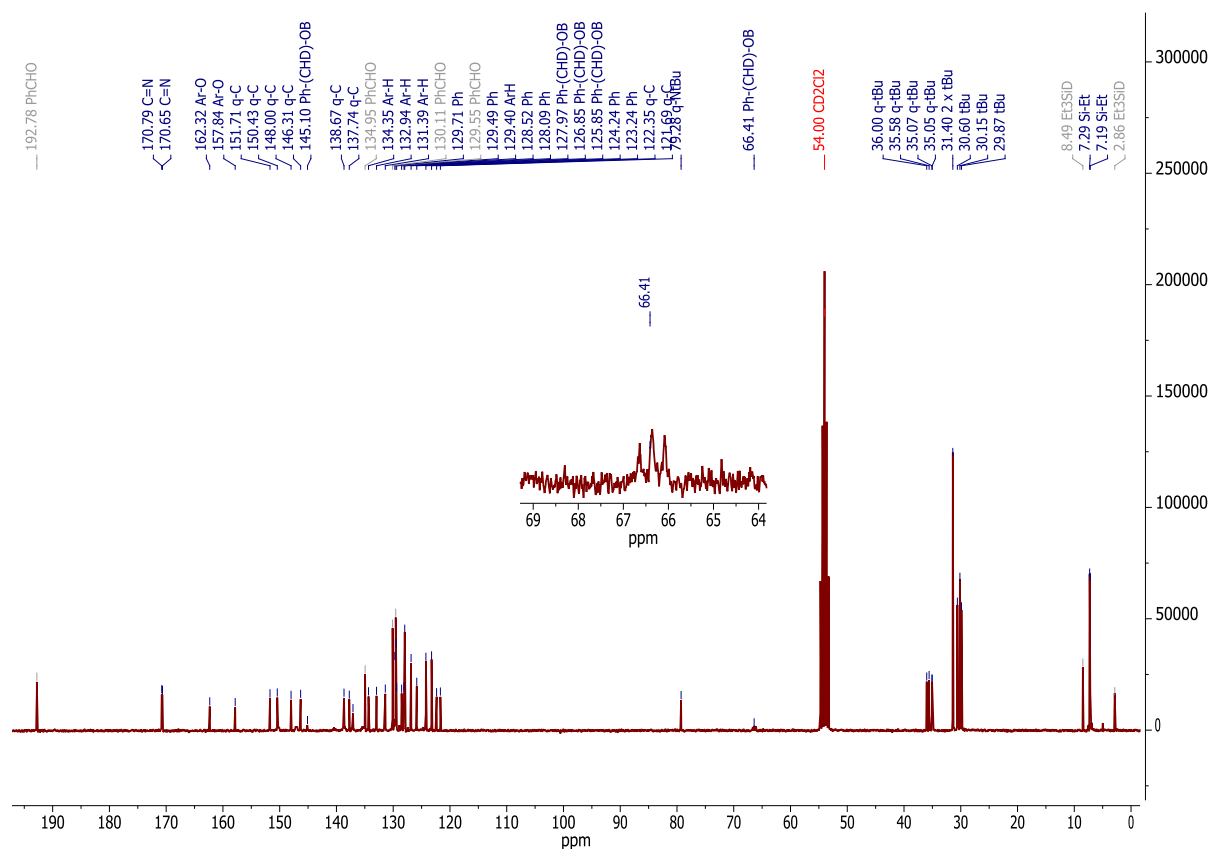

**Figure S10.**  $^{13}\text{C}$  NMR spectrum of **Int 3a'-d<sub>1</sub>** showing the characteristic triplet for the  $-(\text{CHD})-$  group arising from  $^1\text{J}_{(\text{C-D})}$  coupling. The mixture also contains excess  $\text{Et}_3\text{SiD}$  and  $\text{PhCHO}$  as a result of *in situ* measurements.



## NMR and MS spectra of the compounds

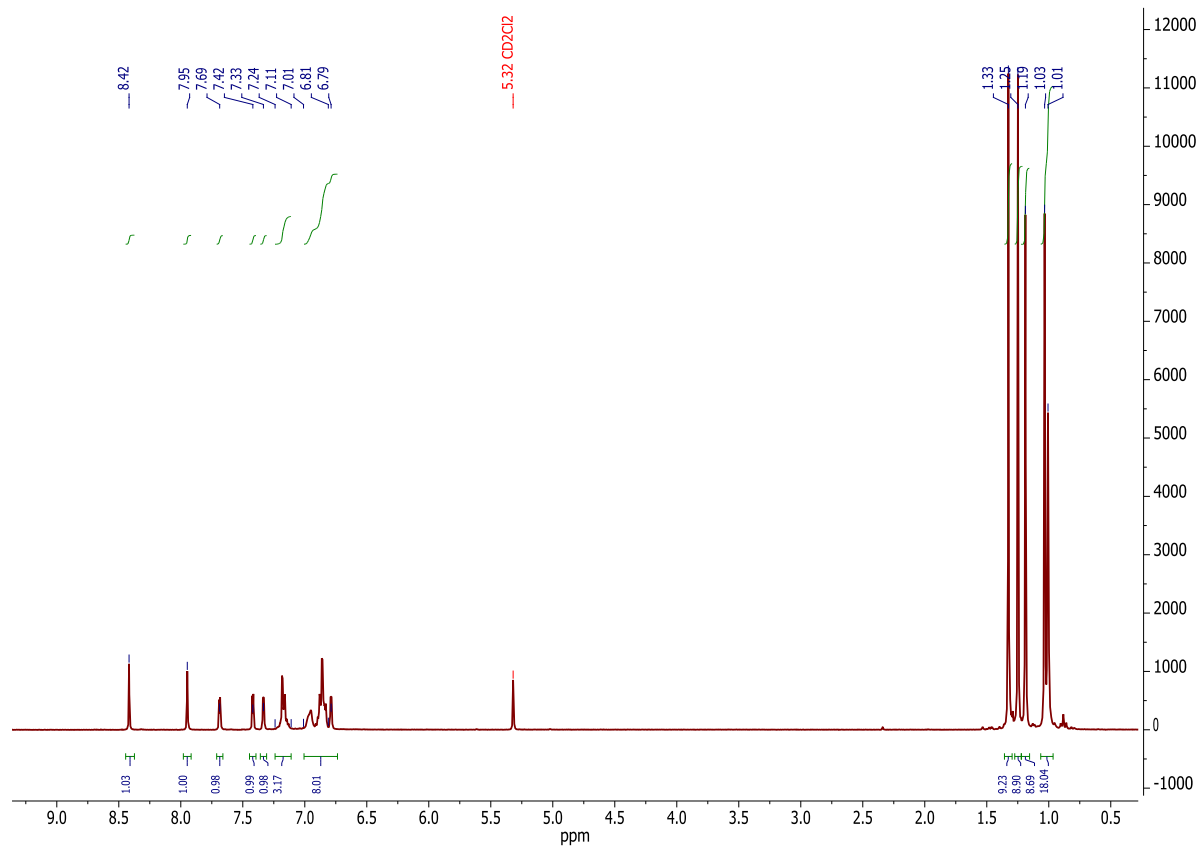

**Figure S11.**  $^1\text{H}$  NMR spectrum of complex **2** in  $\text{CD}_2\text{Cl}_2$ .

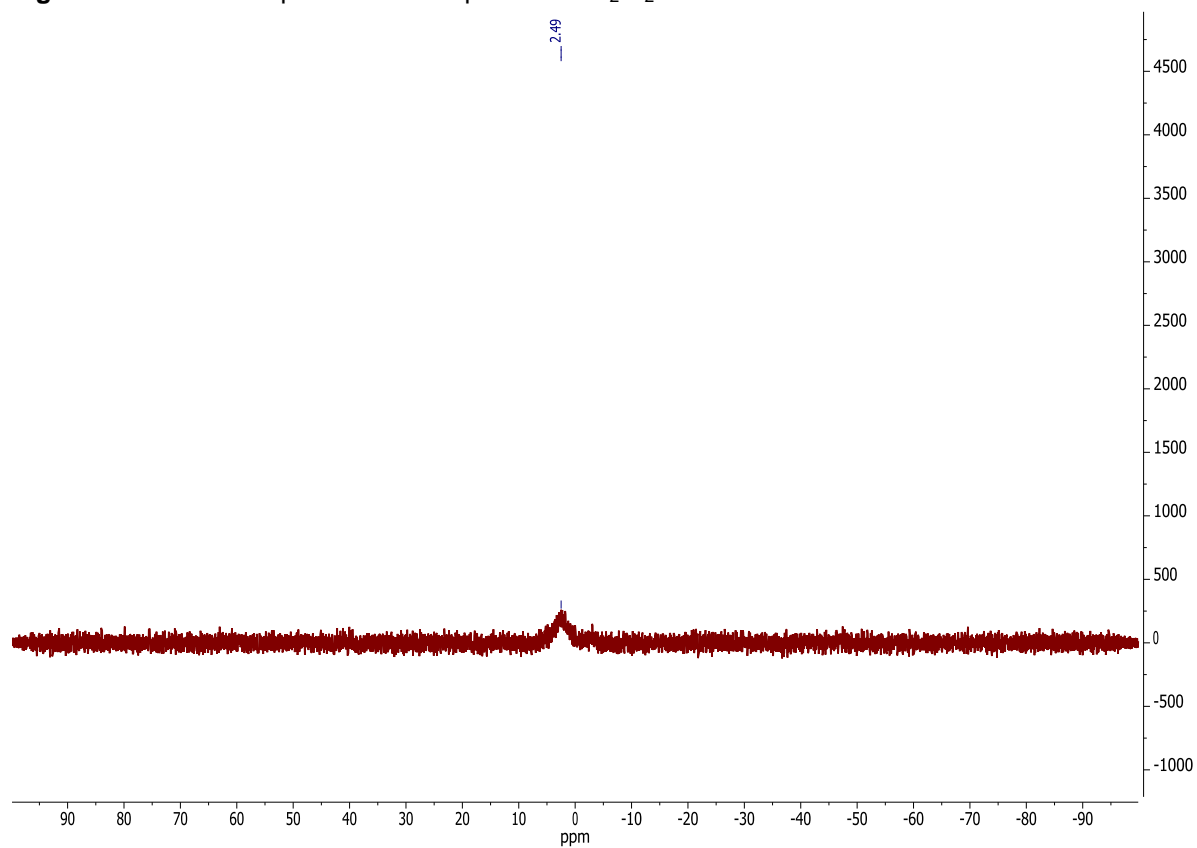

**Figure S12.**  $^{11}\text{B}$  NMR spectrum of complex **2** in  $\text{CD}_2\text{Cl}_2$ .

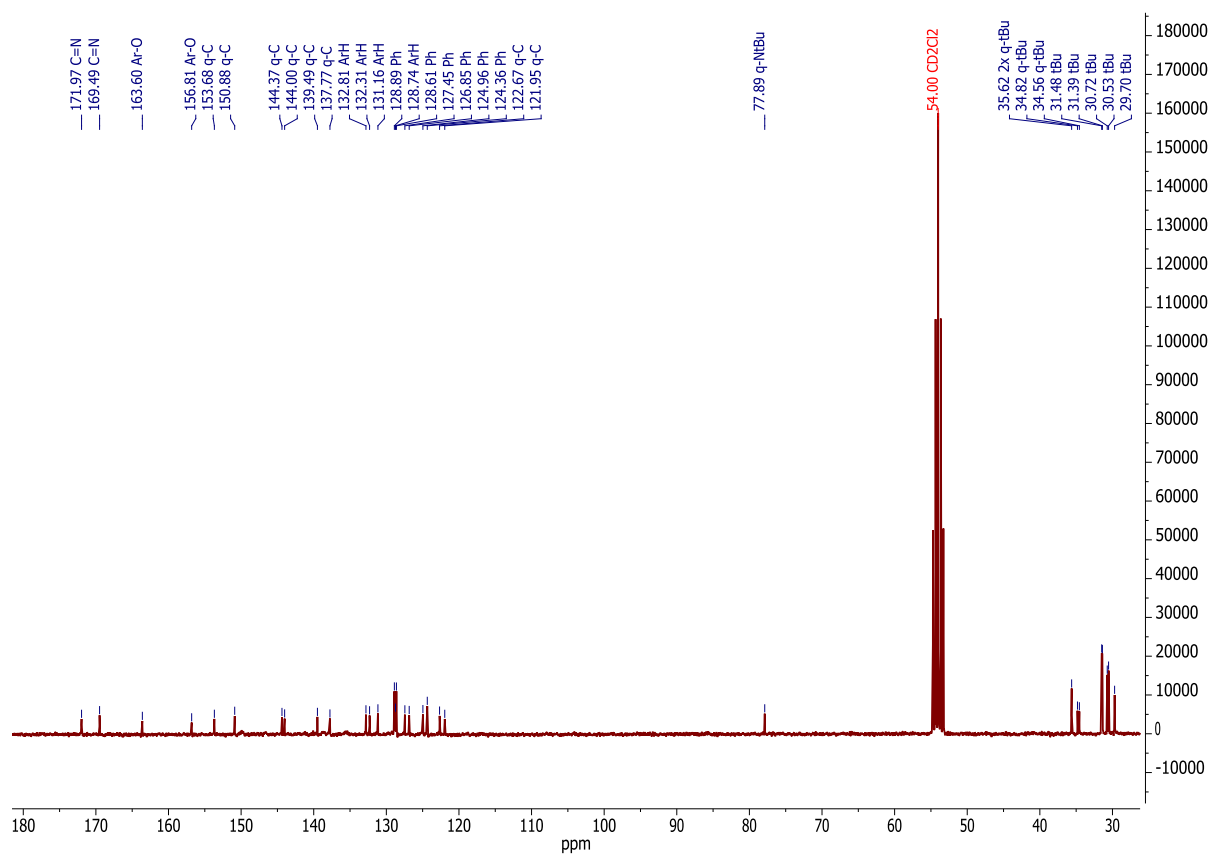

**Figure S13.**  $^{13}\text{C}$  NMR spectrum of complex **2** in  $\text{CD}_2\text{Cl}_2$ .

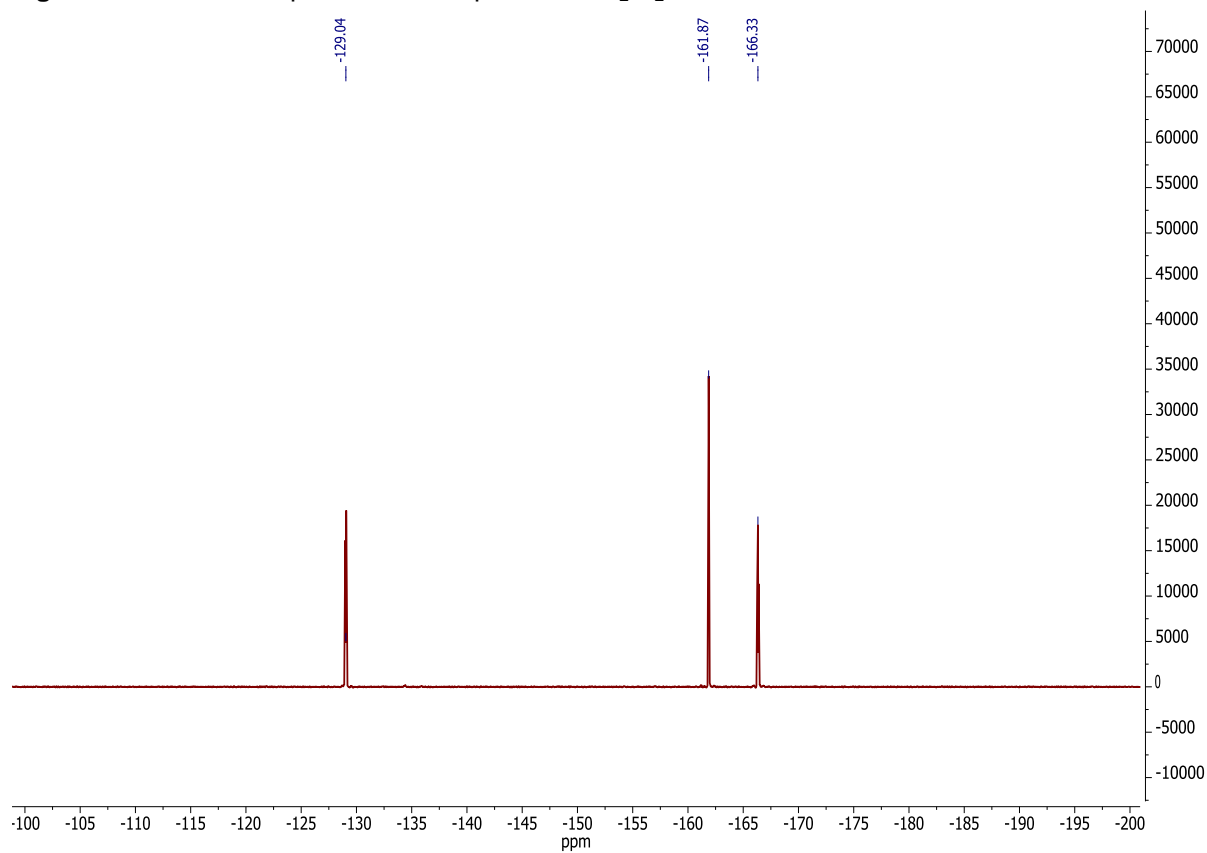

**Figure S14.**  $^{19}\text{F}$  NMR spectrum of complex **2** in  $\text{CD}_2\text{Cl}_2$ .

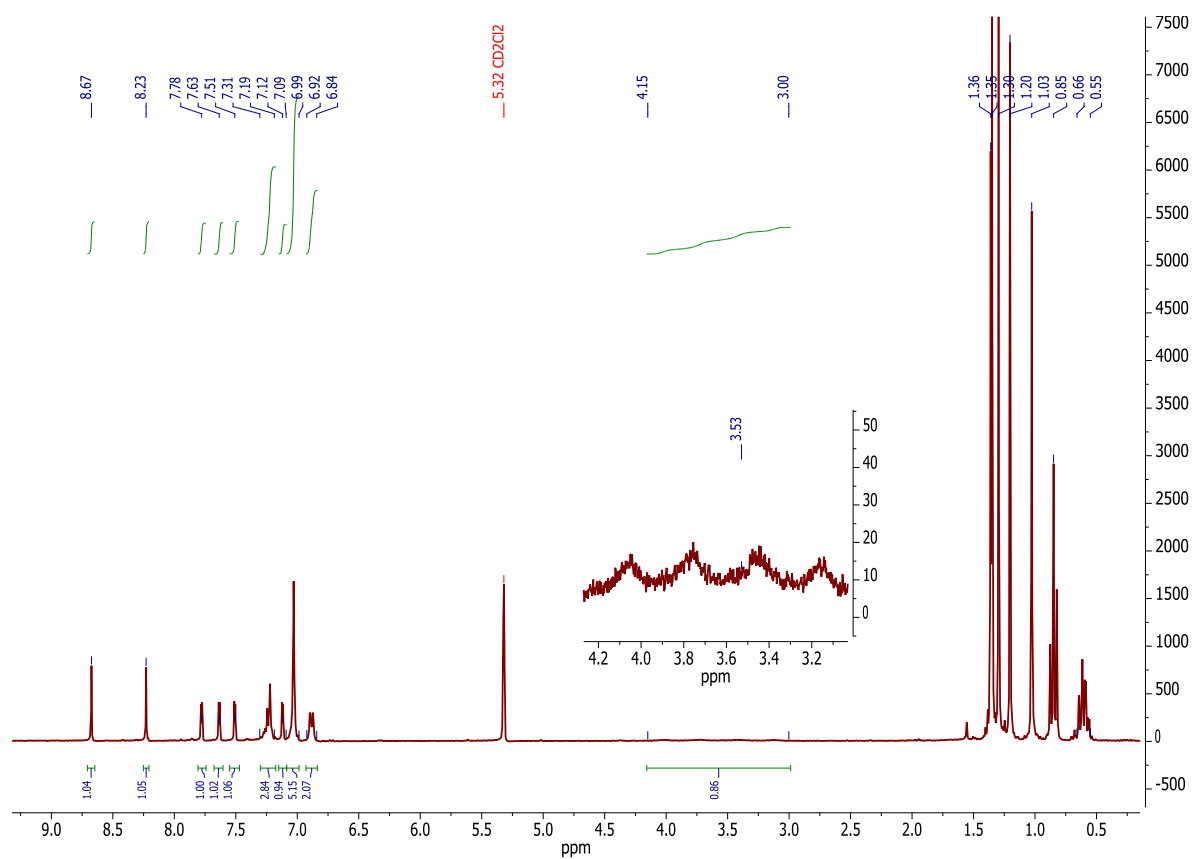

**Figure S15.** <sup>1</sup>H NMR spectrum of complex **3a** in CD<sub>2</sub>Cl<sub>2</sub>.

<sup>11</sup>B NMR (96 MHz, Methylene Chloride-d<sub>2</sub>) δ -25.44 (d, J = 89.9 Hz).

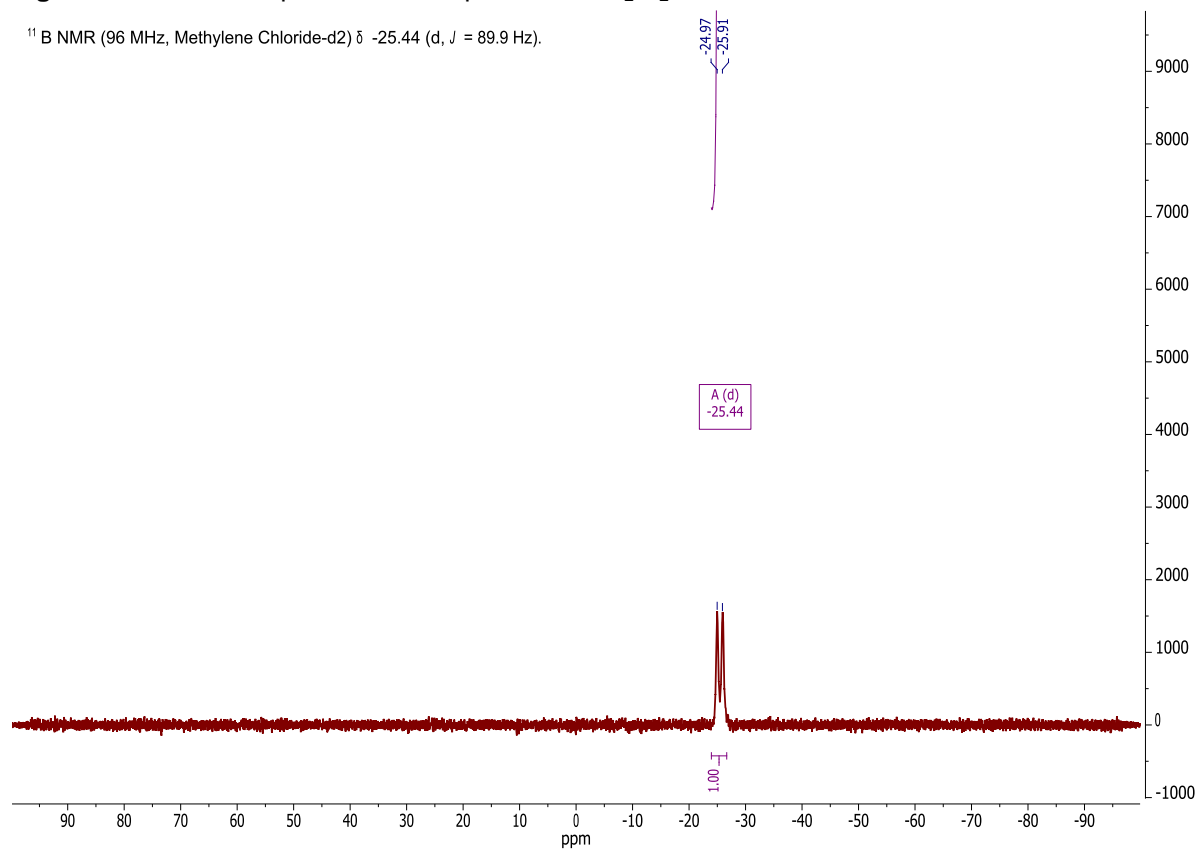

**Figure S16.** <sup>11</sup>B NMR spectrum of complex **3a** in CD<sub>2</sub>Cl<sub>2</sub>.

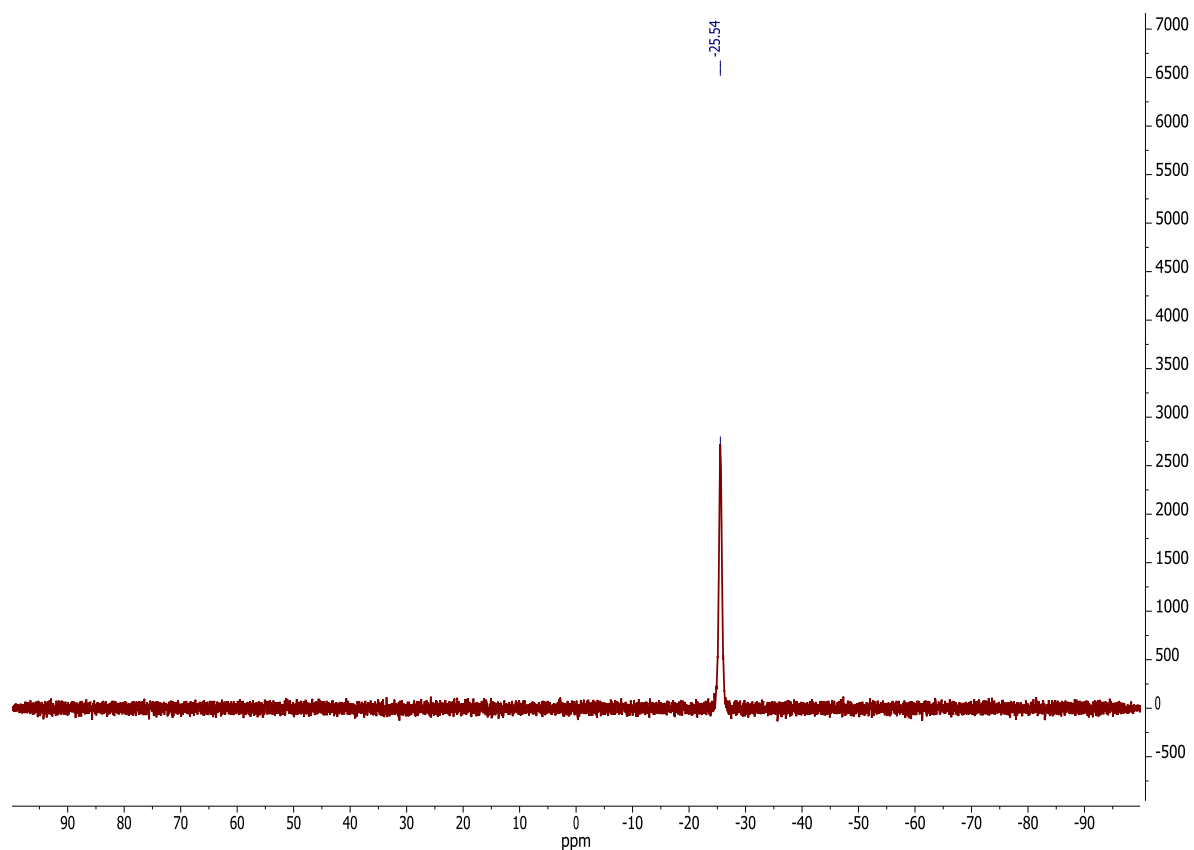

Figure S17.  $^{11}\text{B}$  NMR spectrum of complex **3a-d<sub>1</sub>** in  $\text{CD}_2\text{Cl}_2$ .

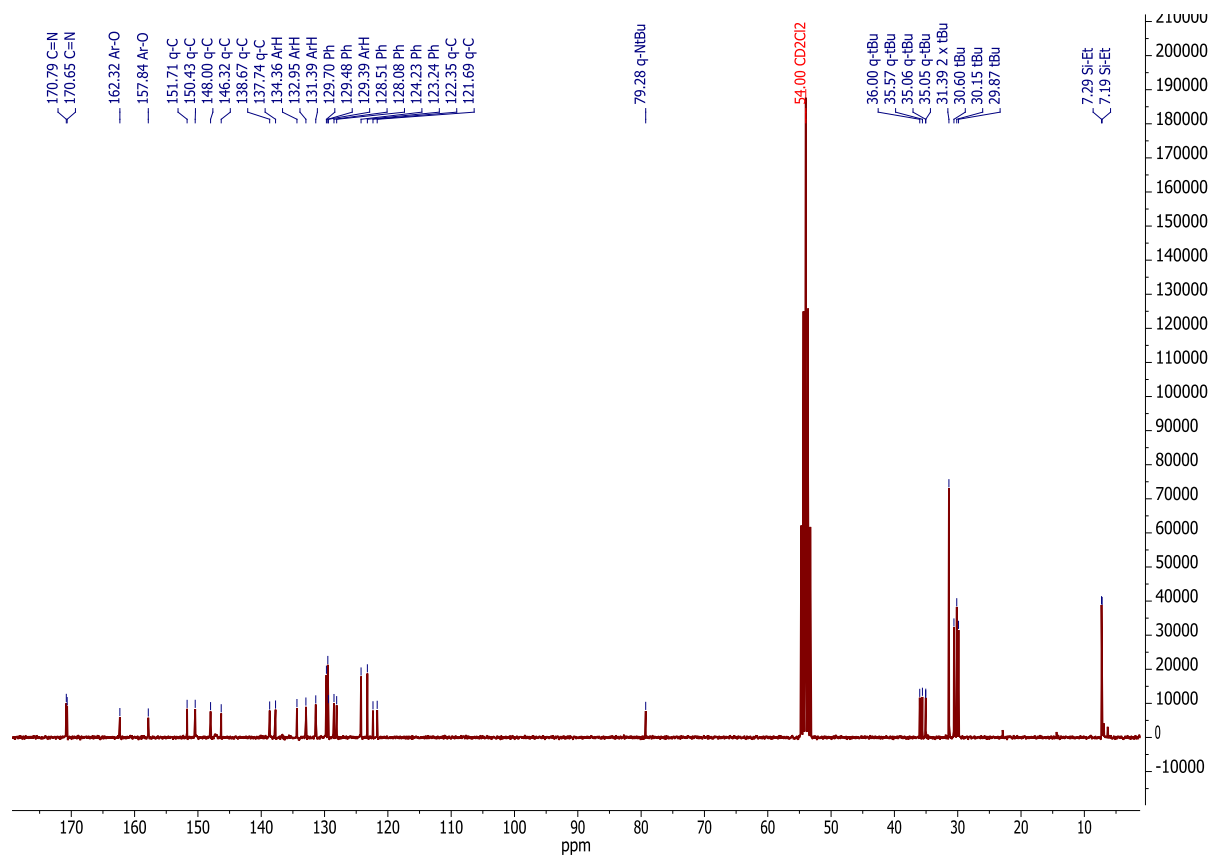

Figure S18.  $^{13}\text{C}$  NMR spectrum of complex **3a** in  $\text{CD}_2\text{Cl}_2$ .

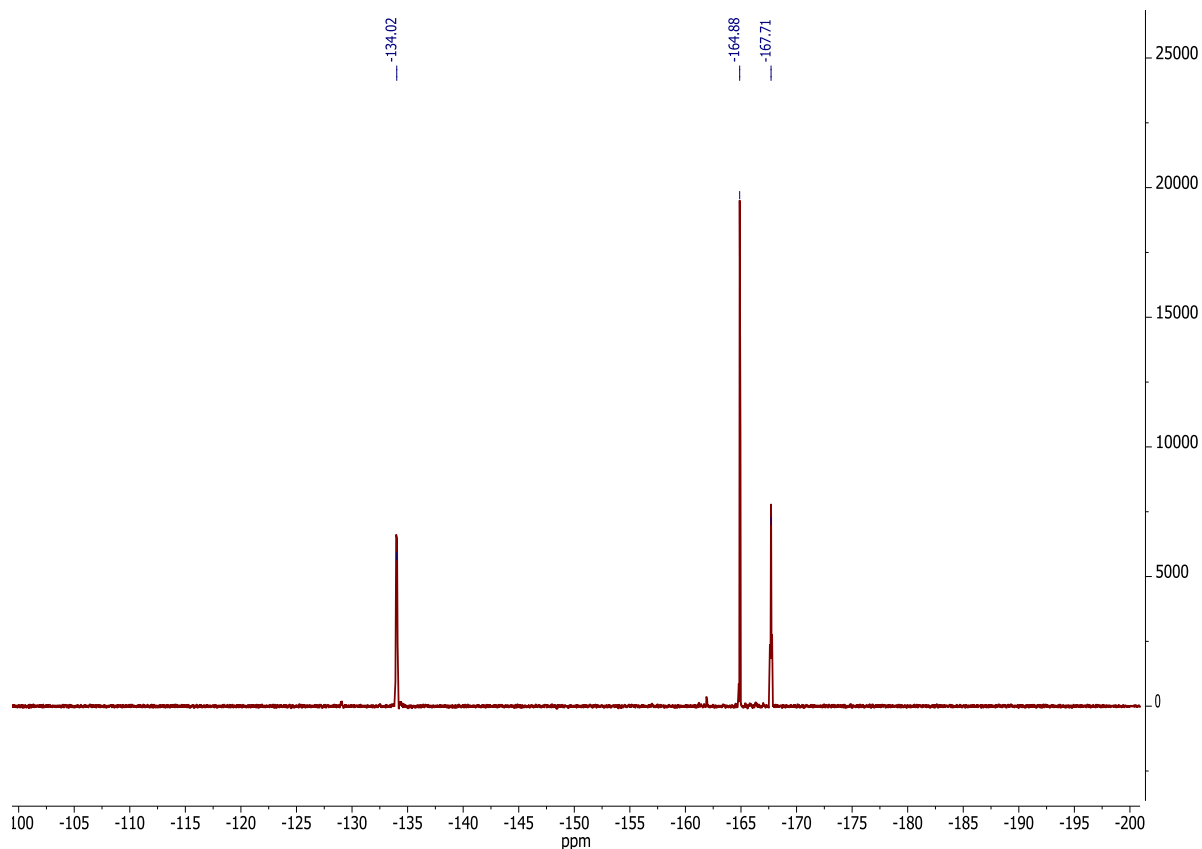

Figure S19.  $^{19}\text{F}$  NMR spectrum of complex **3a** in  $\text{CD}_2\text{Cl}_2$ .

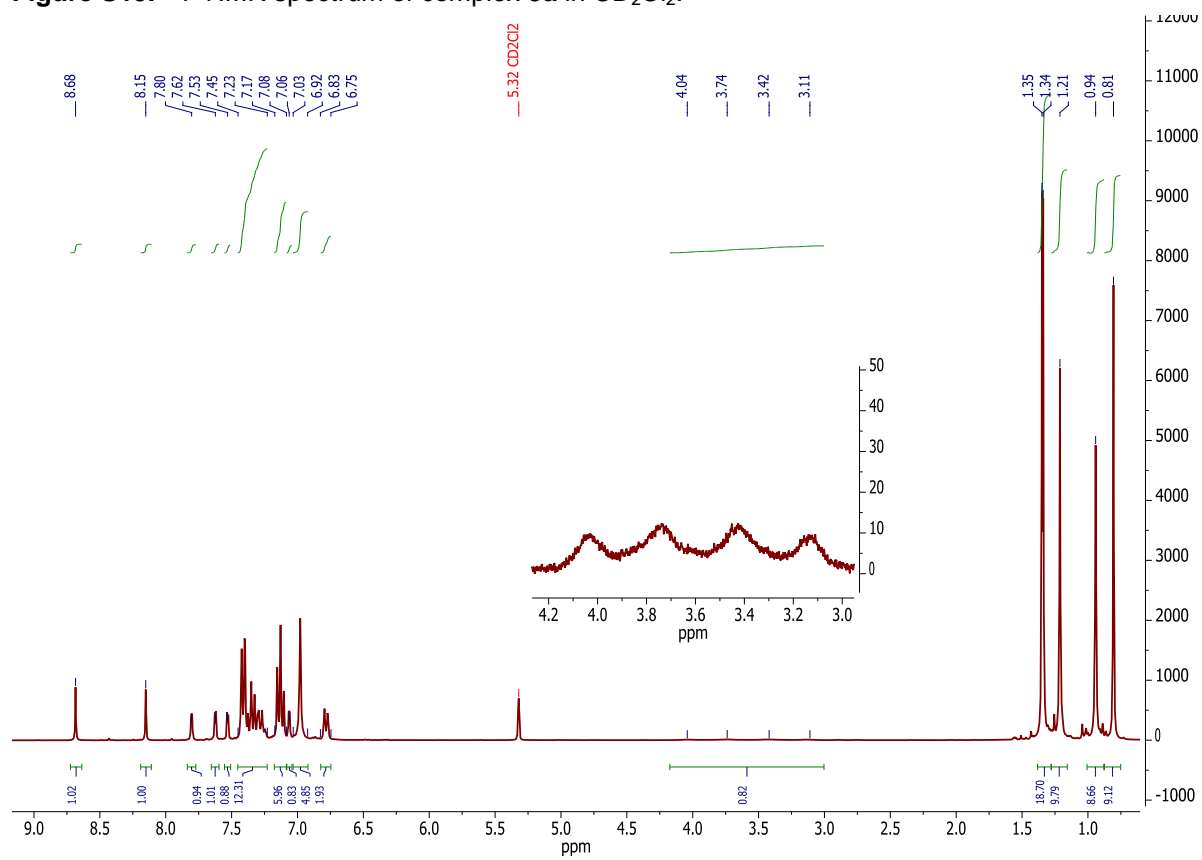

Figure S20.  $^1\text{H}$  NMR spectrum of complex **3b** in  $\text{CD}_2\text{Cl}_2$ .

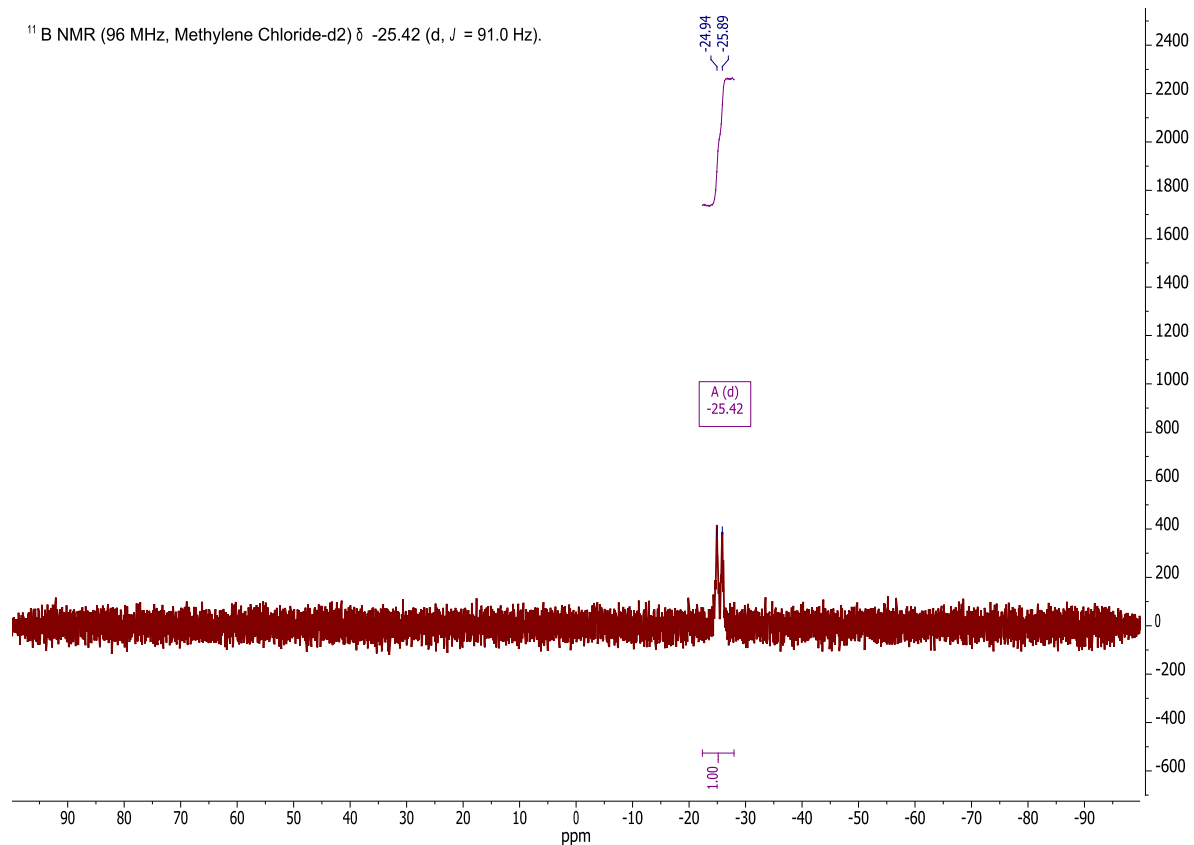

Figure S21.  $^{11}\text{B}$  NMR spectrum of complex **3b** in  $\text{CD}_2\text{Cl}_2$ .

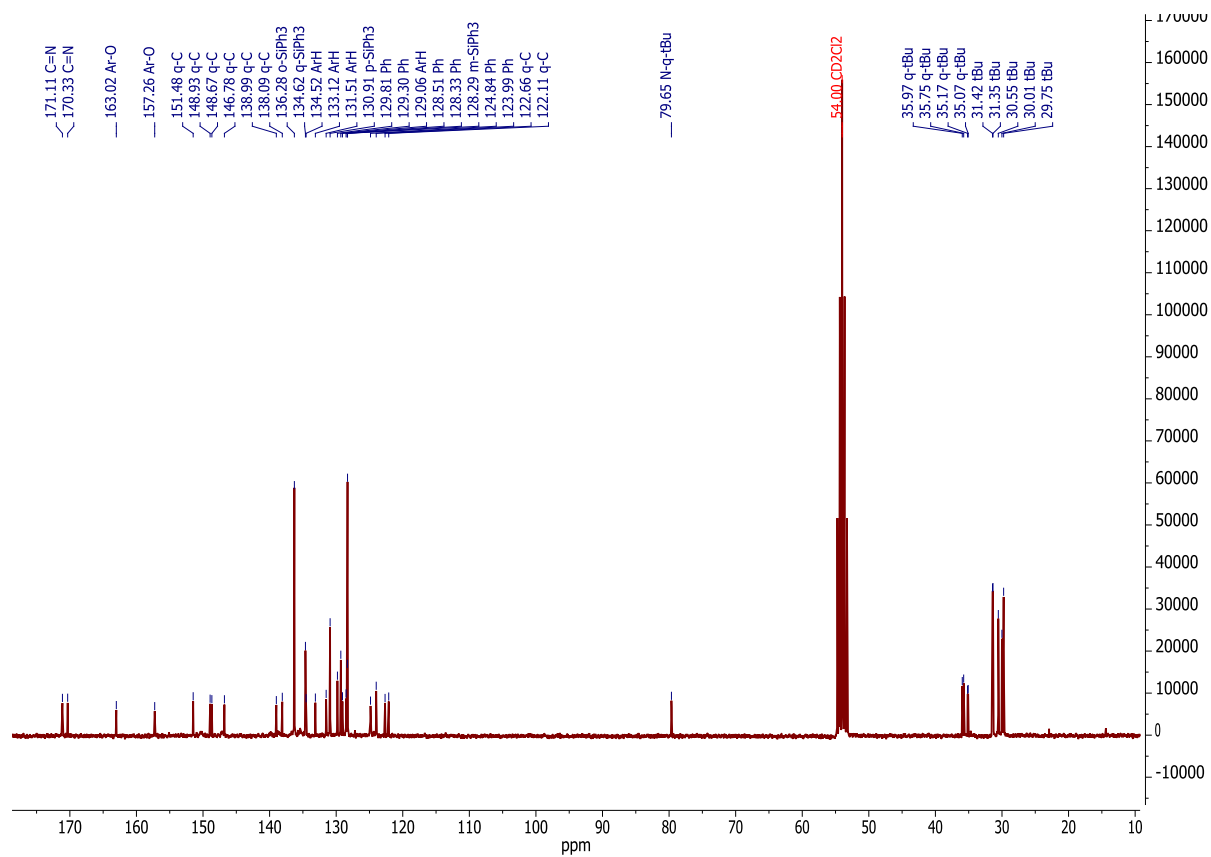

Figure S22.  $^{13}\text{C}$  NMR spectrum of complex **3b** in  $\text{CD}_2\text{Cl}_2$ .

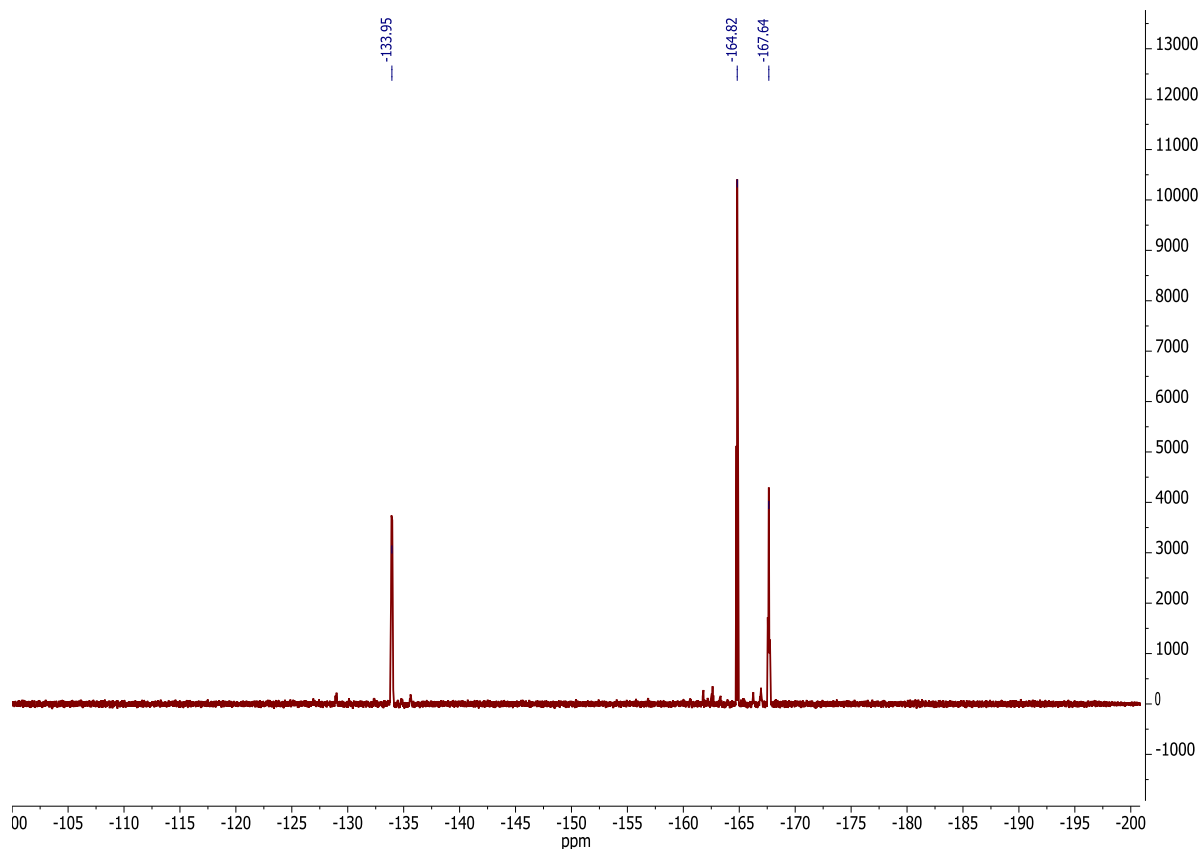

Figure S23.  $^{19}\text{F}$  NMR spectrum of complex **3b** in  $\text{CD}_2\text{Cl}_2$ .

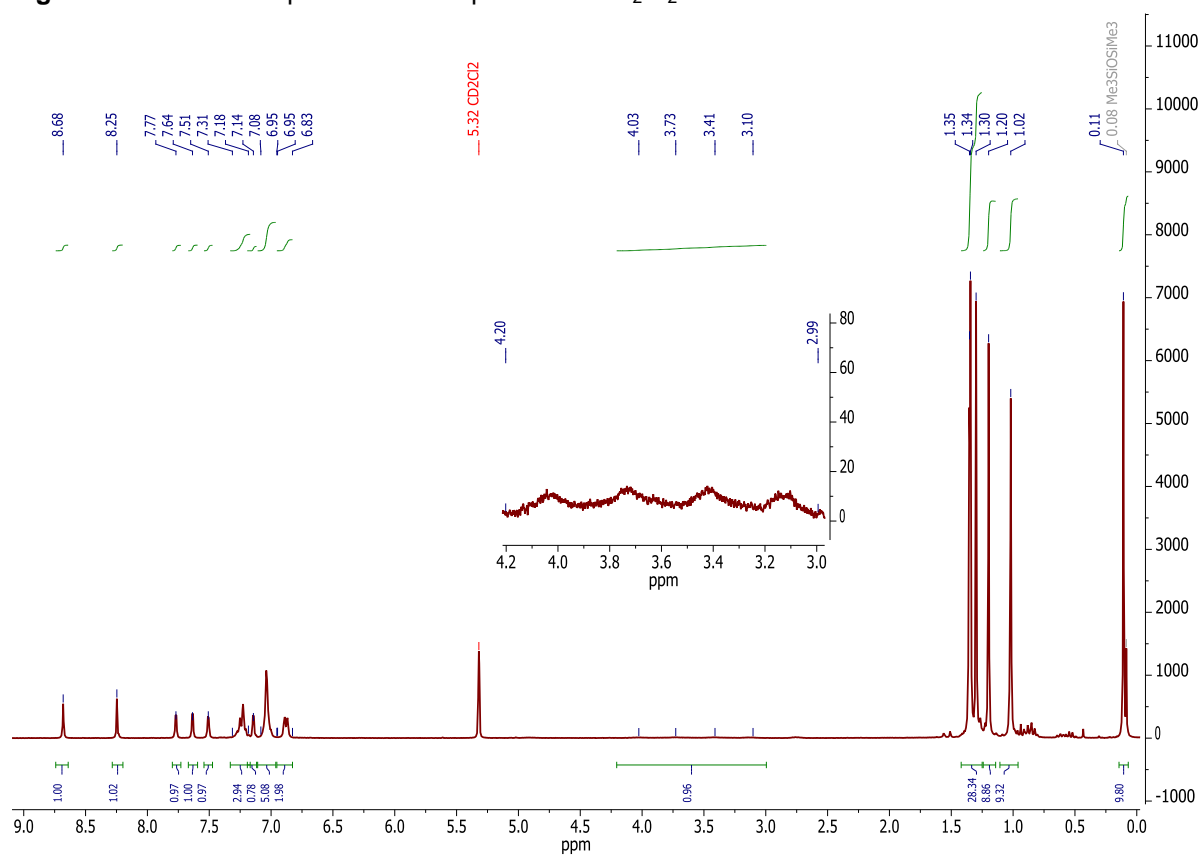

Figure S24.  $^1\text{H}$  NMR spectrum of complex **3c** in  $\text{CD}_2\text{Cl}_2$ .

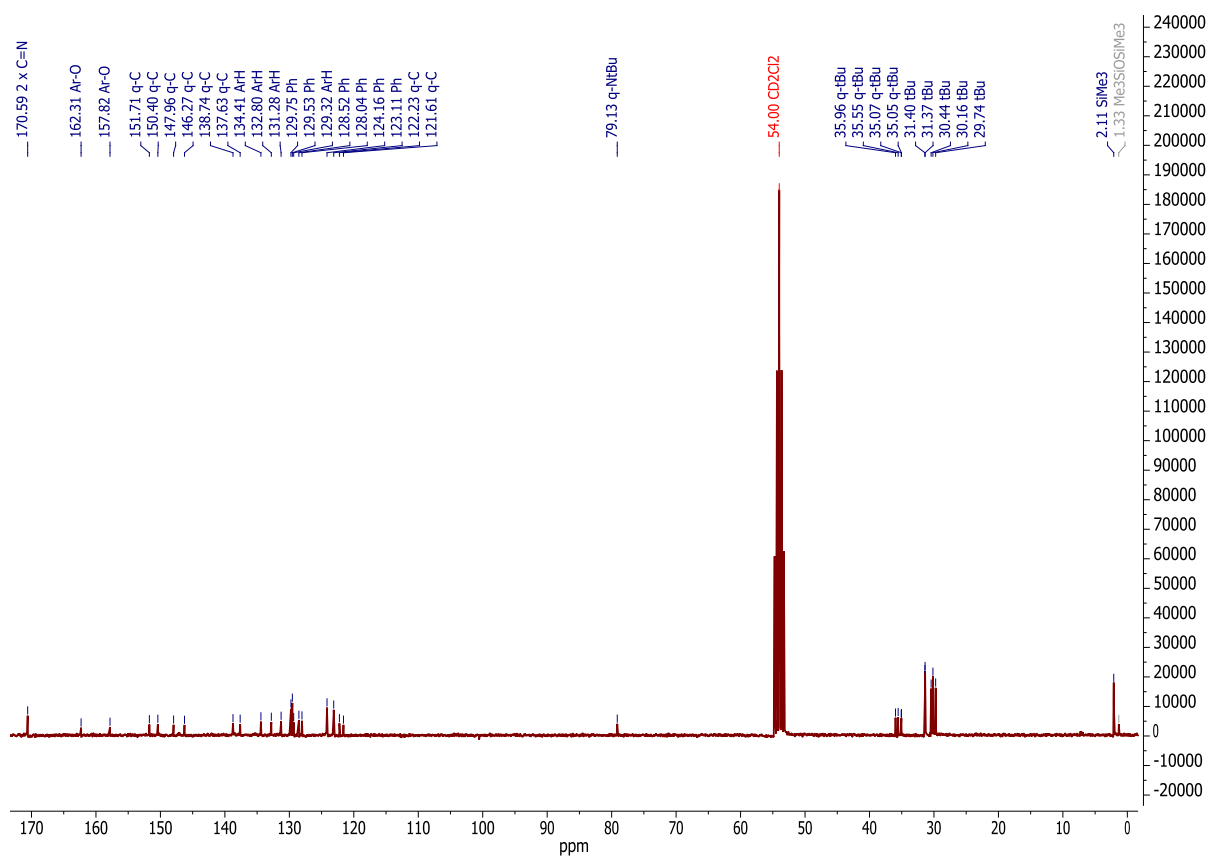

Figure S25.  $^{13}\text{C}$  NMR spectrum of complex **3c** in  $\text{CD}_2\text{Cl}_2$ .

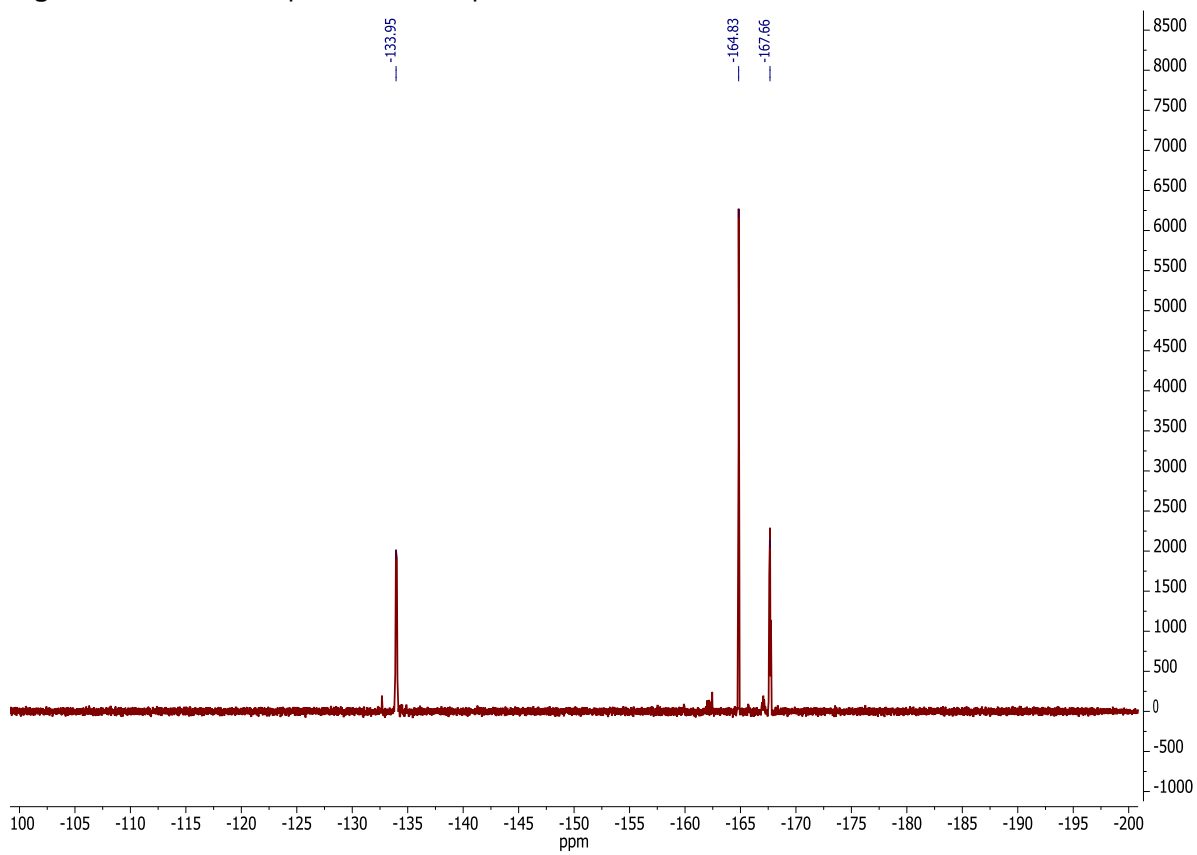

Figure S26.  $^{19}\text{F}$  NMR spectrum of complex **3c** in  $\text{CD}_2\text{Cl}_2$ .



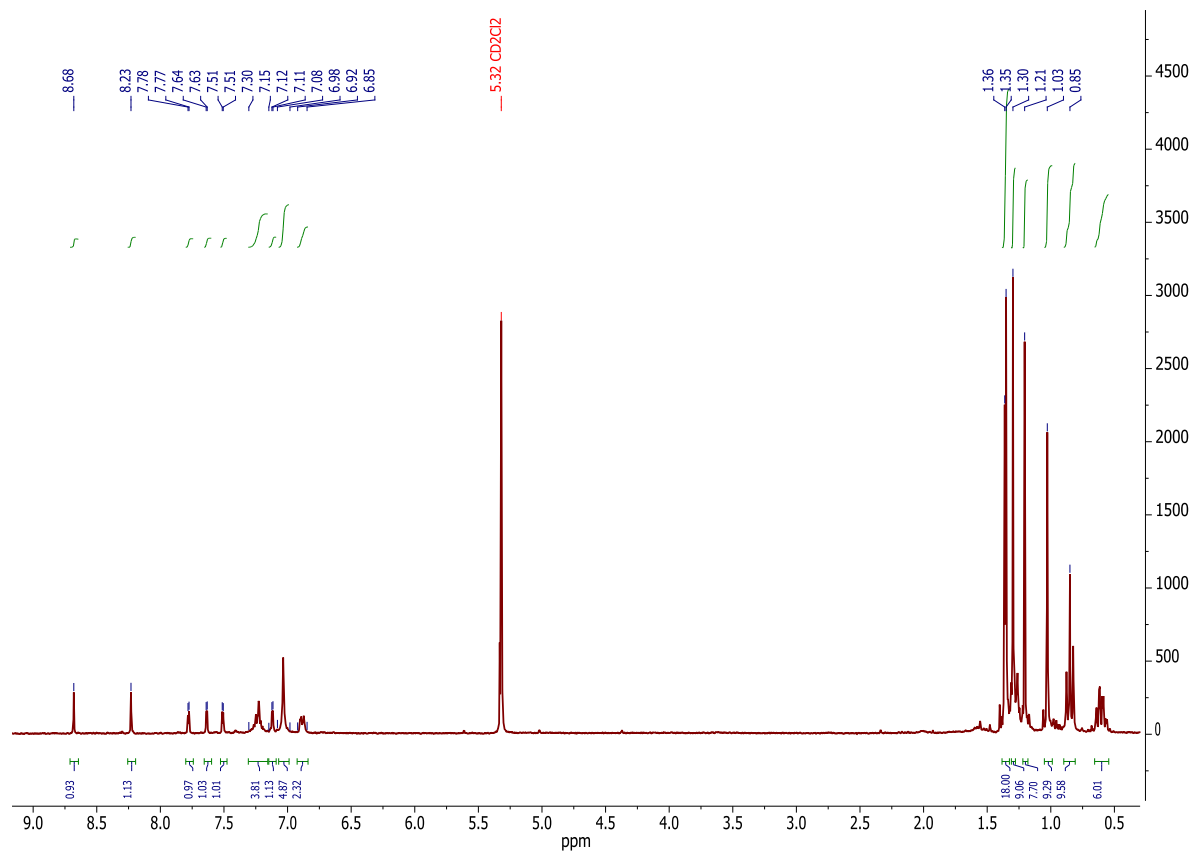

**Figure S27. <sup>1</sup>H NMR spectrum of complex 4a in CD<sub>2</sub>Cl<sub>2</sub>.**

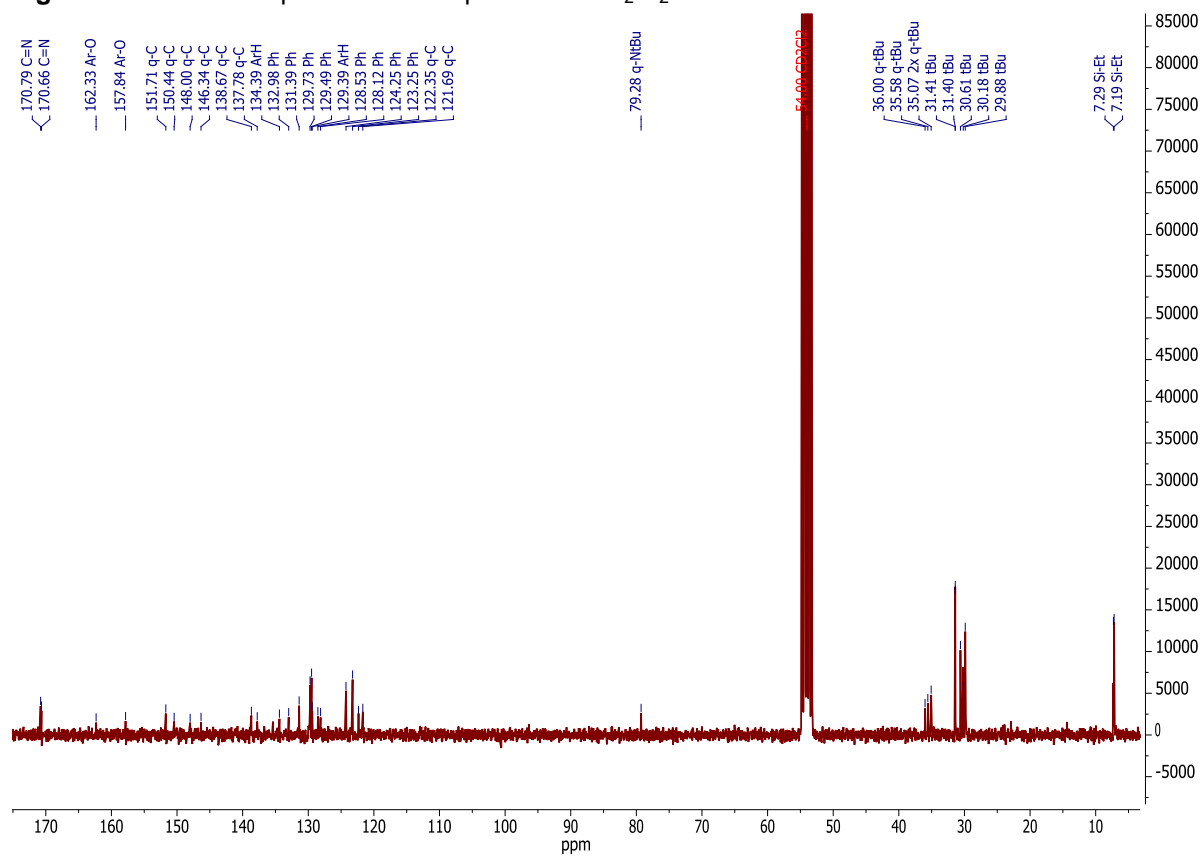

**Figure S28. <sup>13</sup>C NMR spectrum of complex 4a in CD<sub>2</sub>Cl<sub>2</sub>.**

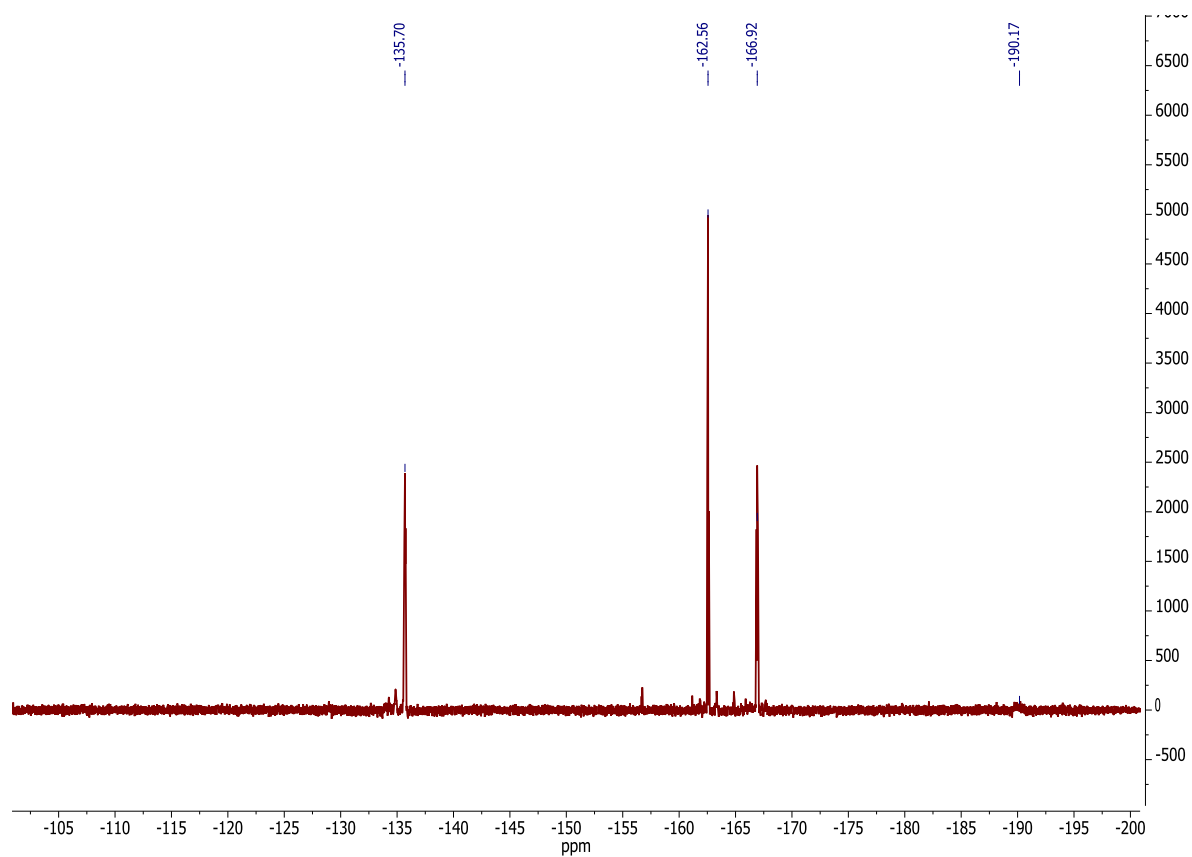

Figure S29.  $^{19}\text{F}$  NMR spectrum of complex **4a** in  $\text{CD}_2\text{Cl}_2$ .

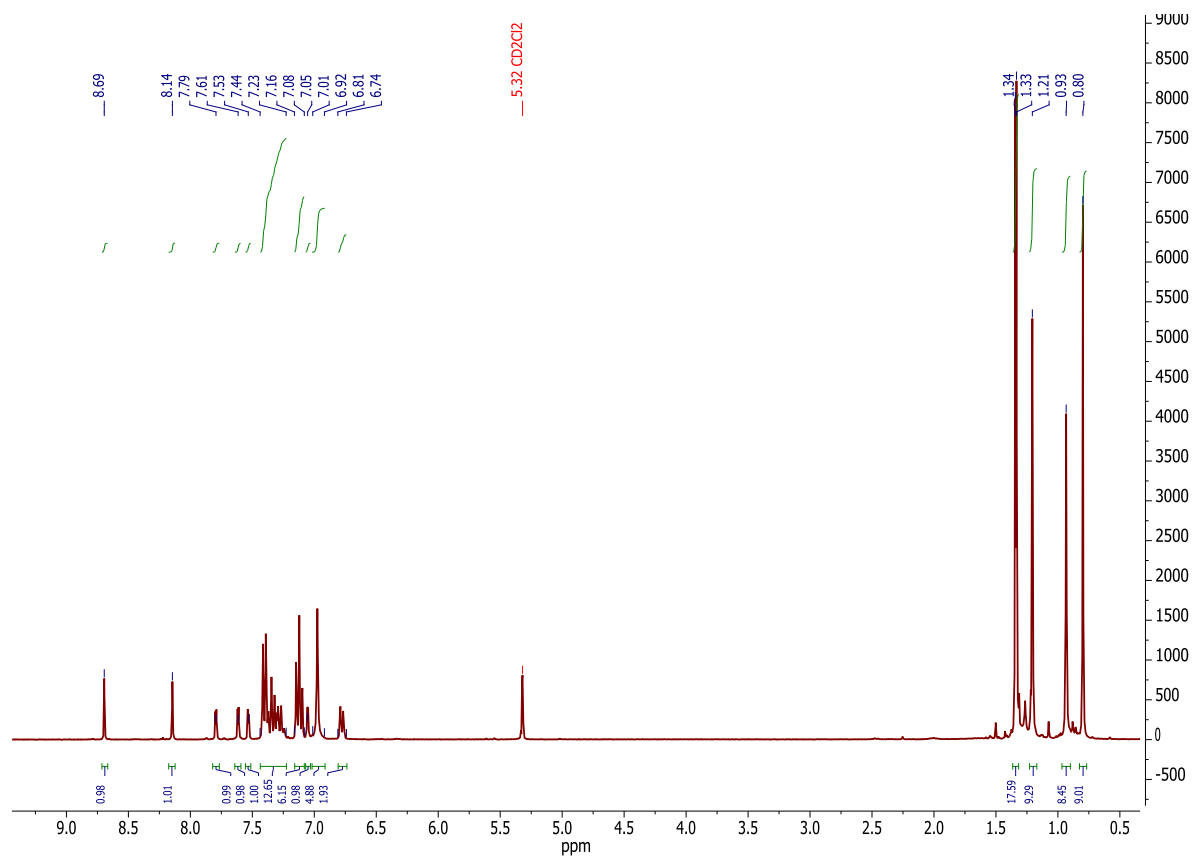

Figure S30.  $^1\text{H}$  NMR spectrum of complex **4b** in  $\text{CD}_2\text{Cl}_2$ .

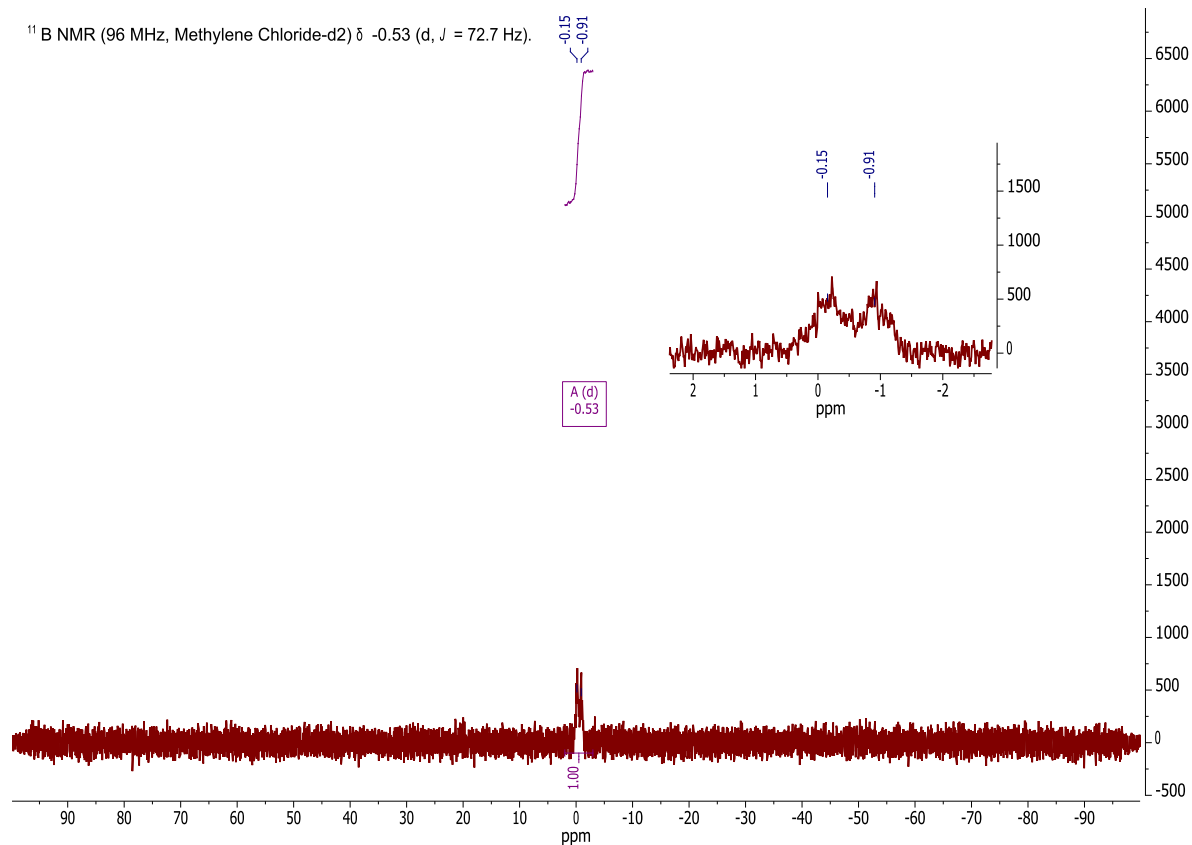

Figure S31.  $^{11}\text{B}$  NMR spectrum of complex **4b** in  $\text{CD}_2\text{Cl}_2$ .

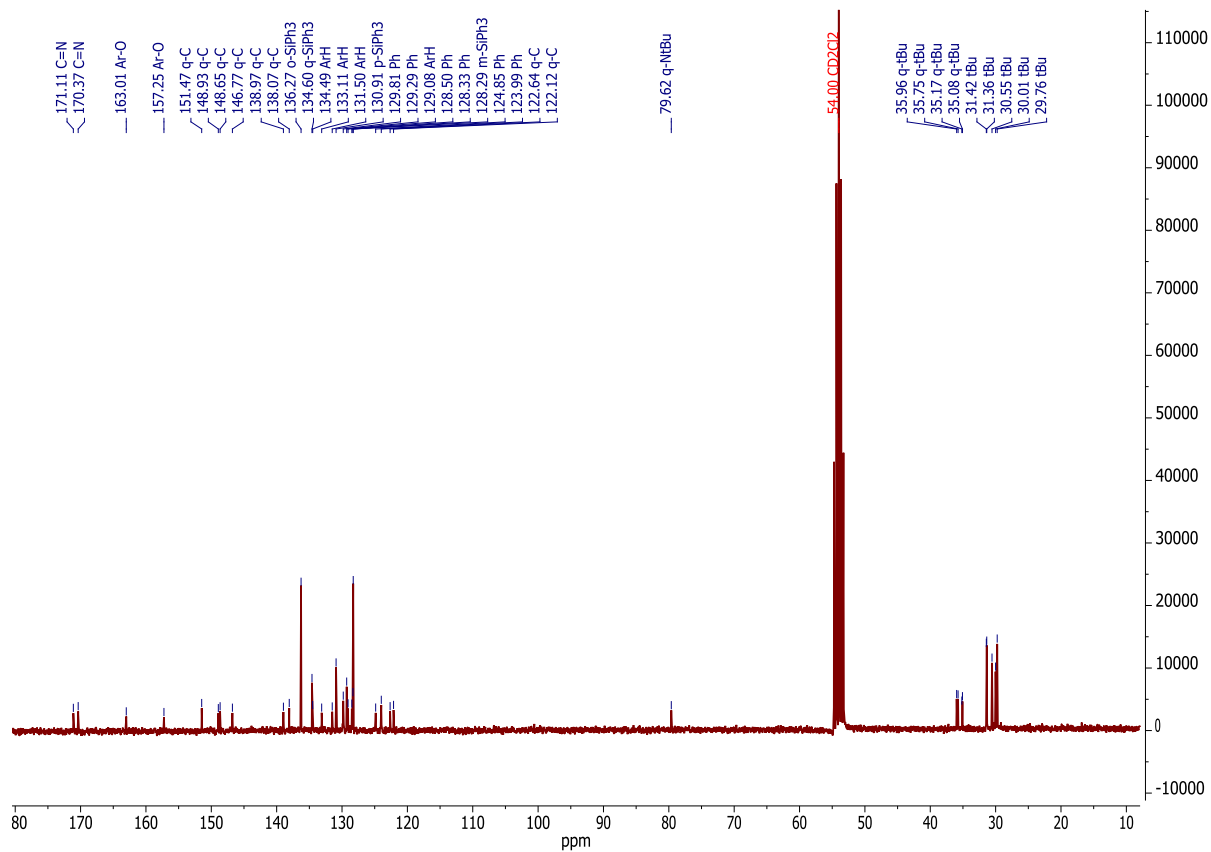

Figure S32.  $^{13}\text{C}$  NMR spectrum of complex **4b** in  $\text{CD}_2\text{Cl}_2$ .

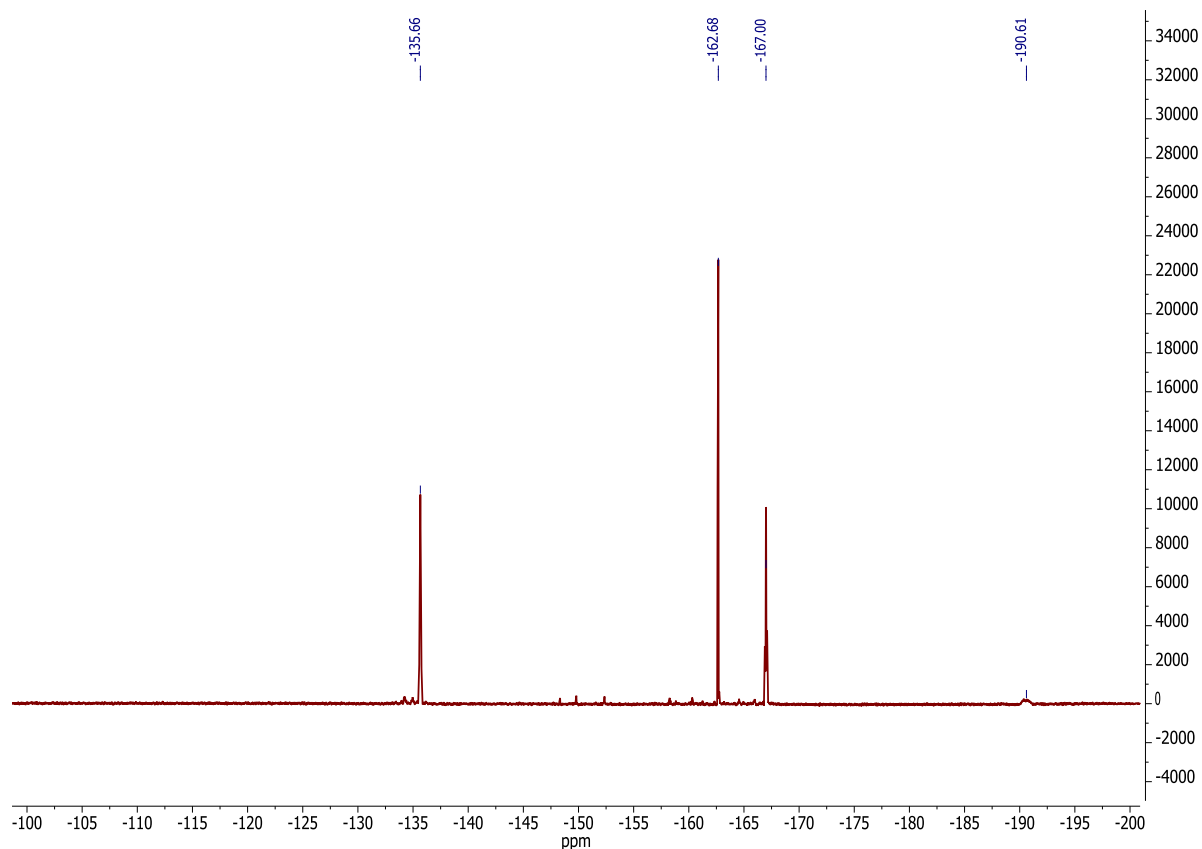

**Figure S33.**  $^{19}\text{F}$  NMR spectrum of complex **4b** in  $\text{CD}_2\text{Cl}_2$ .

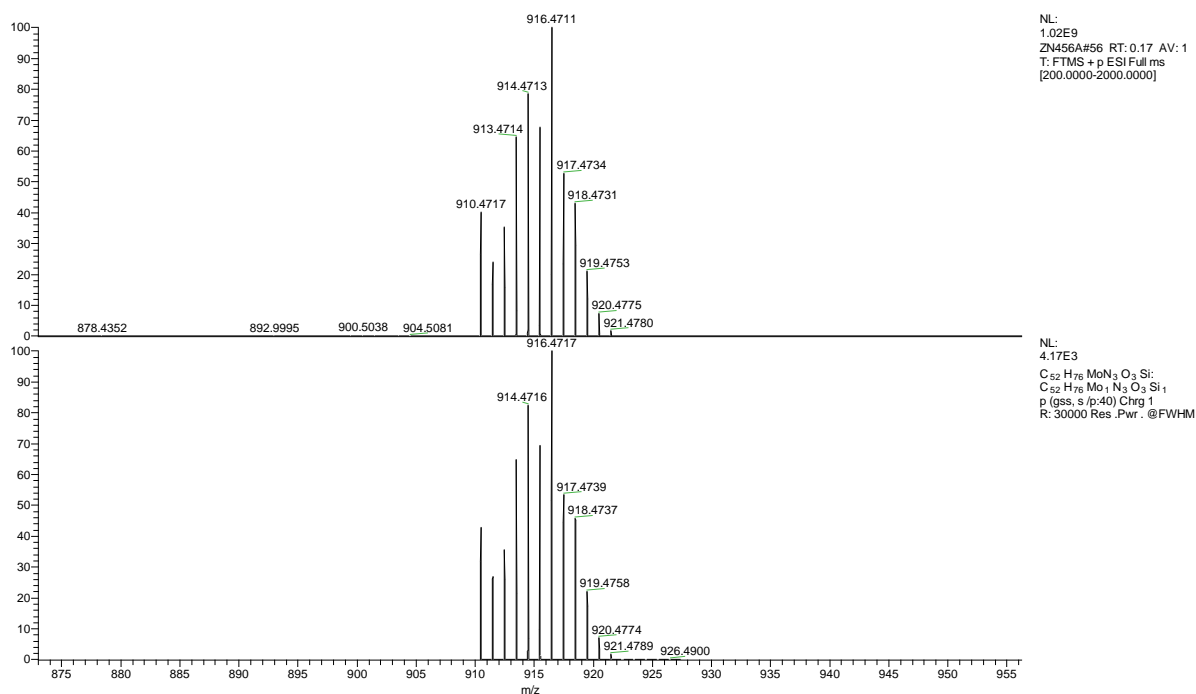

**Figure S34.** ESI-MS (positive mode) spectrum for **3a**, showing the peak for  $[\text{Mo}(\text{OSiEt}_3)(\text{NtBu})]^+$  with the correct isotope pattern.

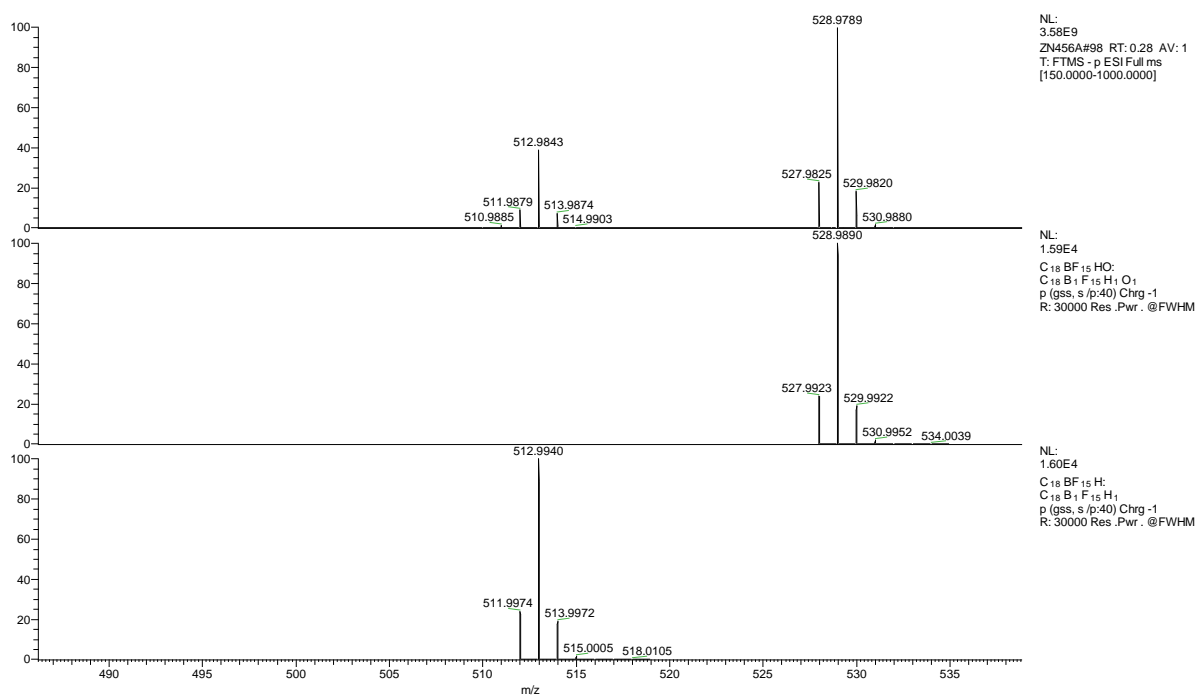

**Figure S35.** ESI-MS (negative mode) spectrum for **3a**, showing peaks for  $[\text{HB}(\text{C}_6\text{F}_5)_3]^-$  and  $[\text{HOB}(\text{C}_6\text{F}_5)_3]^-$ , the latter presumably originating from a reaction with adventitious water in the sample.

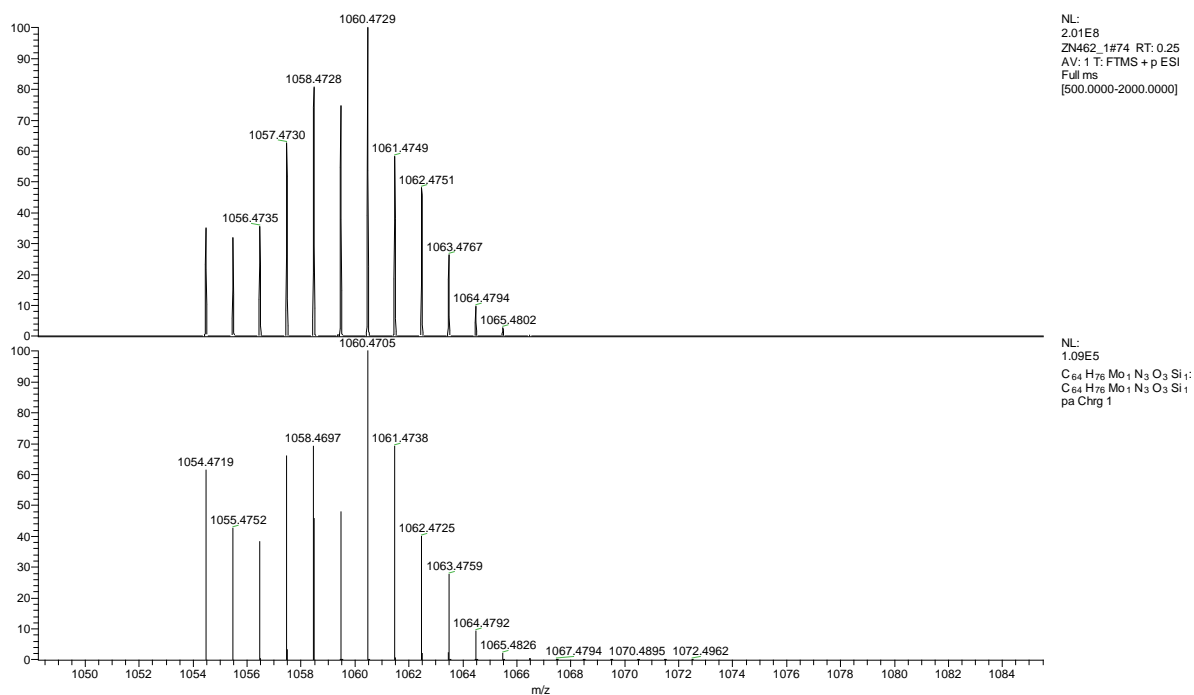

**Figure S36.** ESI-MS (positive mode) spectrum for **3b**, showing the peak for  $[\text{Mo}(\text{OSiPh}_3)(\text{NtBu})]^+$  with the correct isotope pattern.

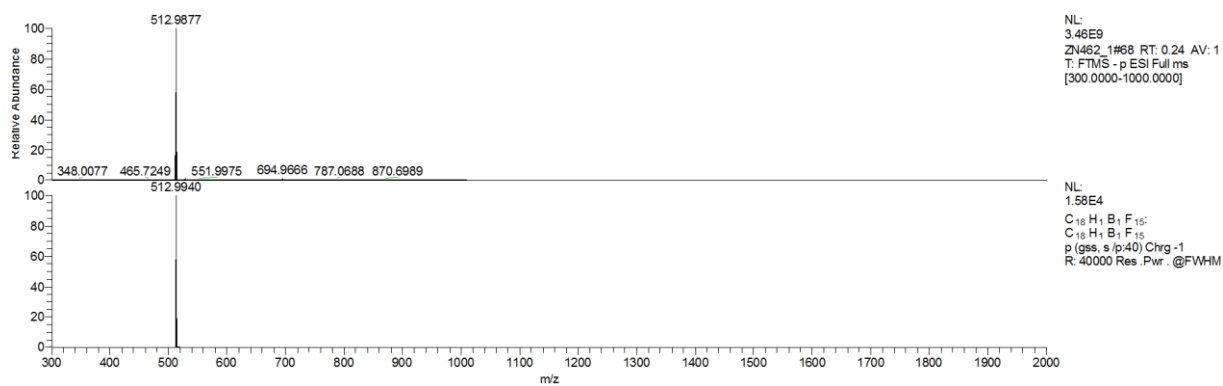

**Figure S37.** ESI-MS (negative mode) spectrum for **3b**, showing the peak for  $[\text{HB}(\text{C}_6\text{F}_5)_3]^-$ .

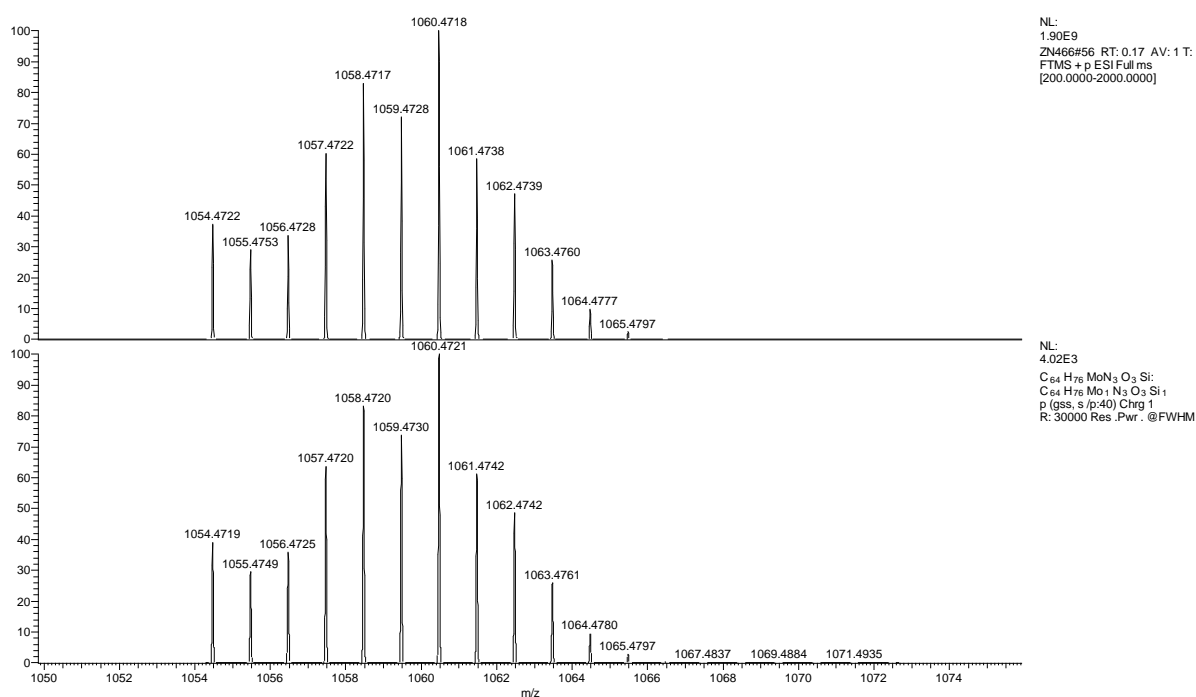

**Figure S38.** ESI-MS (positive mode) spectrum for **4b**, showing the peak for  $[\text{Mo}(\text{OSiPh}_3)(\text{NtBu})]^+$  with the correct isotope pattern.

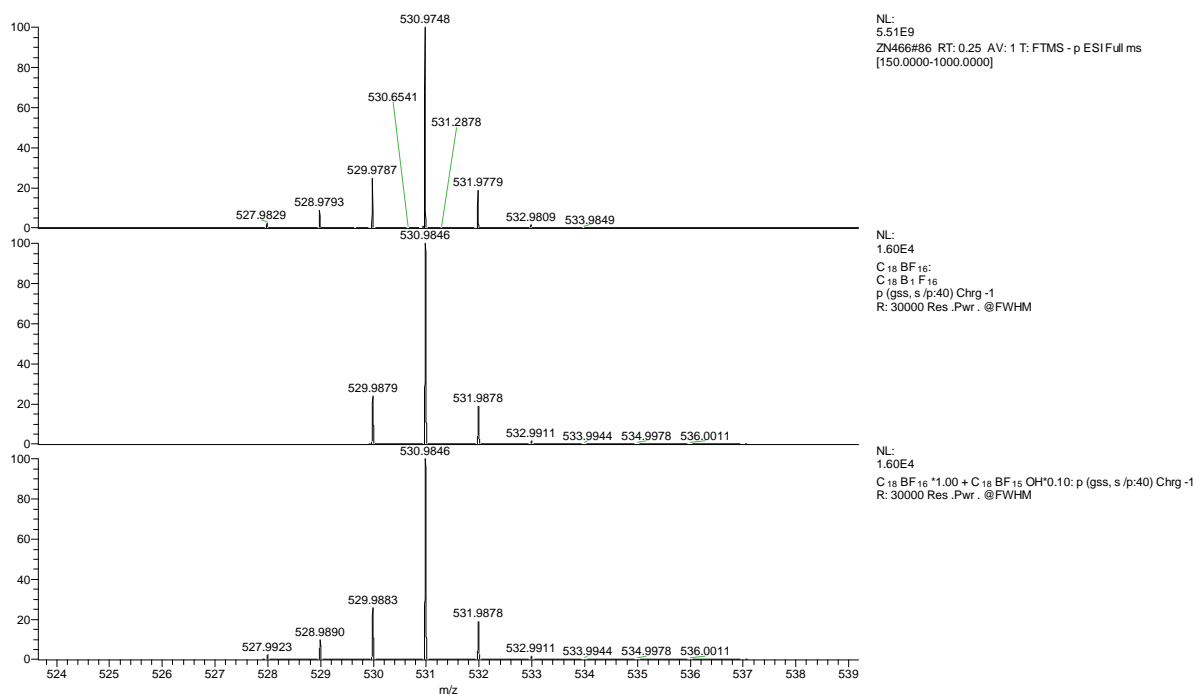

**Figure S39.** ESI-MS (negative mode) spectrum for **4b**, showing a peak for  $[\text{FB}(\text{C}_6\text{F}_5)_3]^-$ , accompanied by a small amount of  $[\text{HOB}(\text{C}_6\text{F}_5)_3]^-$ , the latter presumably originating from a reaction with adventitious water in the sample.

### Electrochemistry data of the compounds

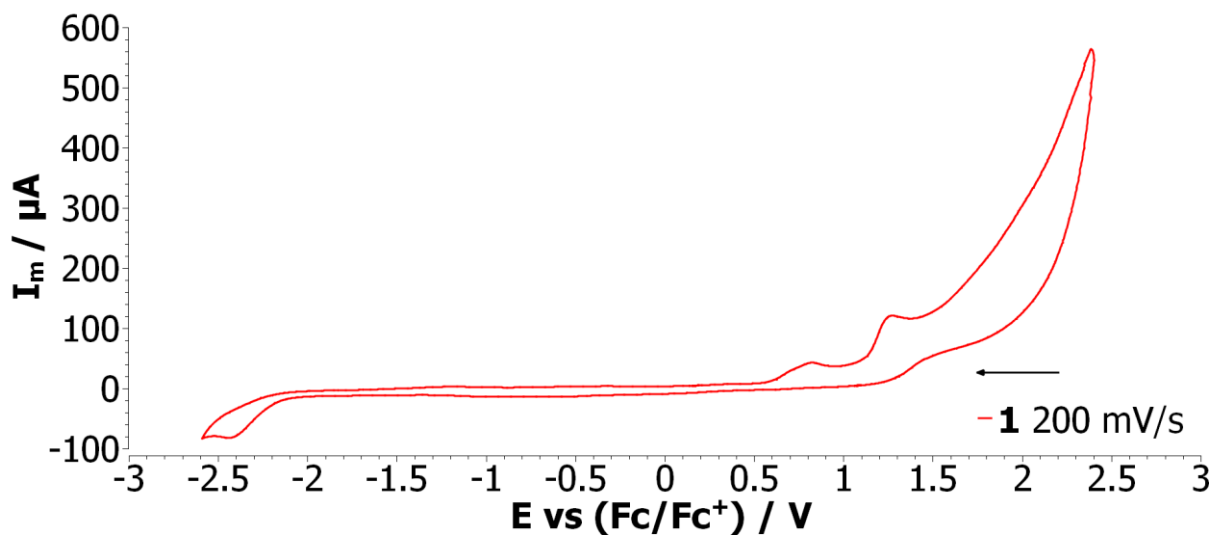

**Figure S40.** Full sweep-width cyclic voltammogram of complex **1**<sup>[1]</sup> in MeCN.

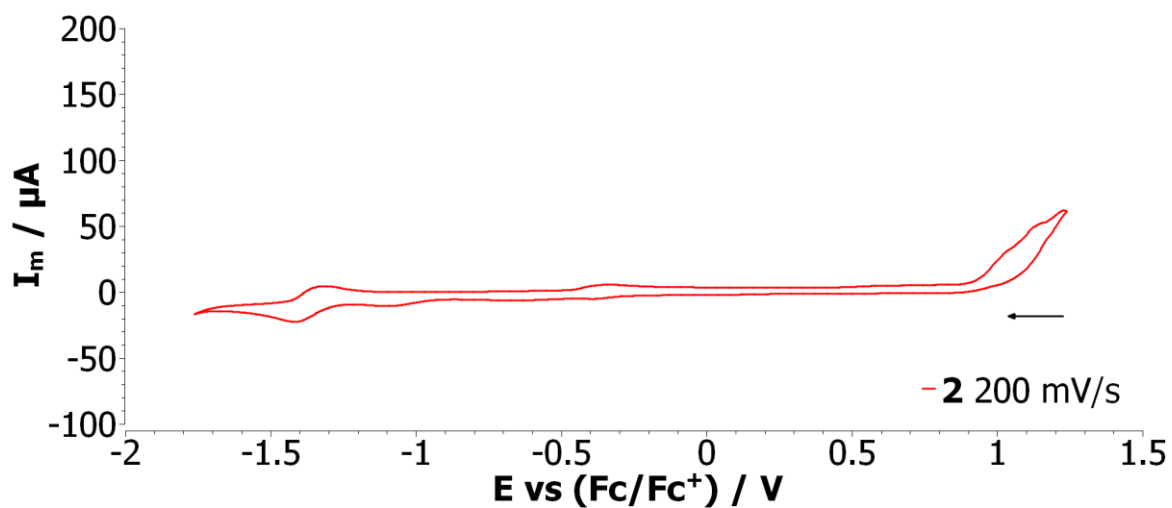

Figure S41. Full sweep-width cyclic voltammogram of complex **2** in  $\text{CH}_2\text{Cl}_2$ .

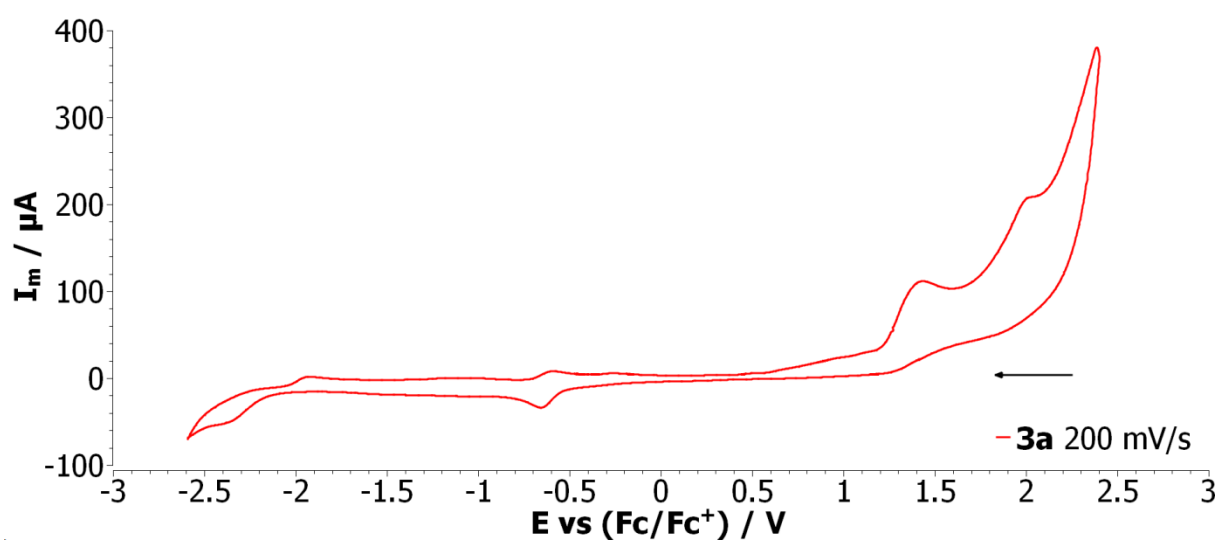

Figure S42. Full sweep-width cyclic voltammogram of complex **3a** in MeCN.

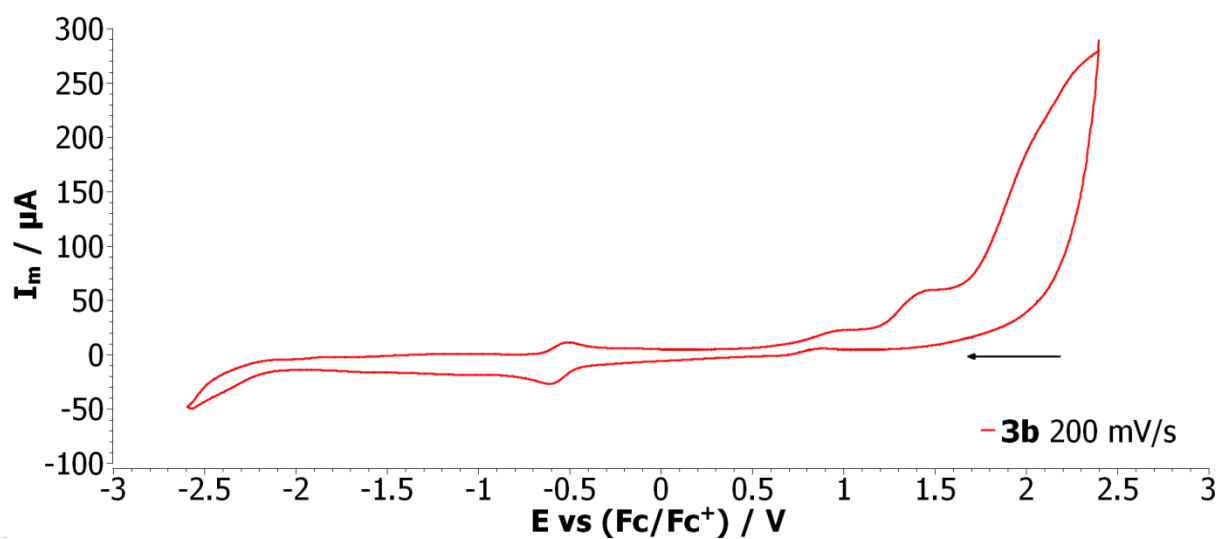

Figure S43. Full sweep-width cyclic voltammogram of complex **3b** in MeCN.



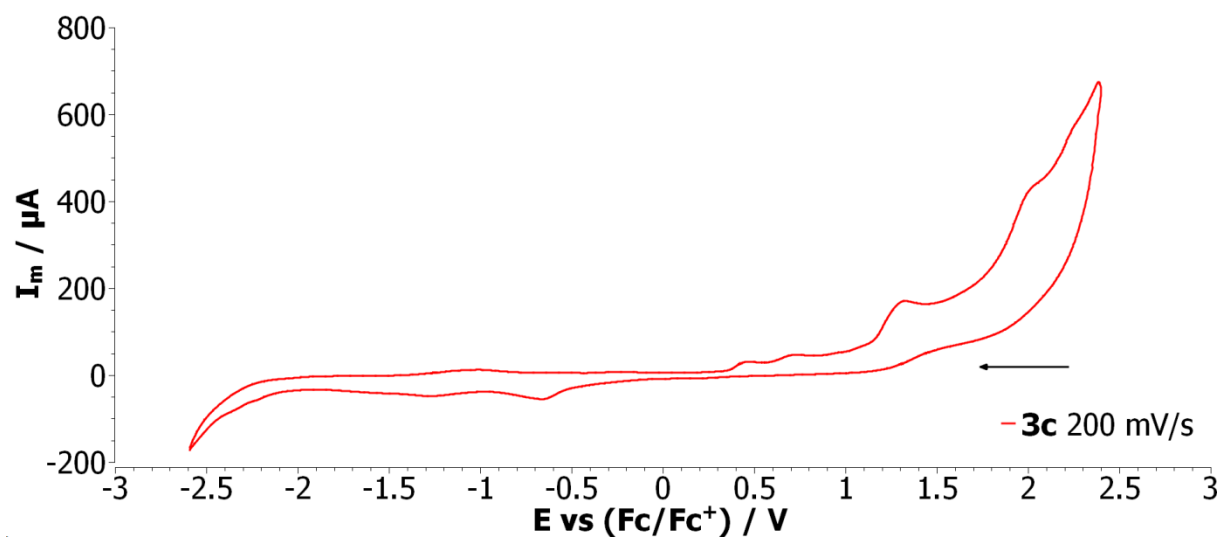

**Figure S44.** Full sweep-width cyclic voltammogram of complex **3c** in MeCN.

## Crystallographic data for 2 and 4b

**Crystal structure determination of 2.** The structure was solved by direct methods (SHELXS-97)<sup>[3]</sup> and refined by full-matrix least-squares techniques against  $F^2$  (SHELXL-2014/6).<sup>[4]</sup> The non-hydrogen atoms of the two complexes of the asymmetric unit were refined with anisotropic displacement parameters without any constraints. The H atoms of the phenyl rings including any adjacent CH=N groups were put at the external bisectors of the C–C–C angles at C–H distances of 0.95Å and common isotropic displacement parameters were refined for the H atoms of the same ring. The H atoms of the *tert*-butyl groups were refined with common isotropic displacement parameters for the H atoms of the same group and idealized geometries with tetrahedral angles, enabling rotation around the C–C bonds, and C–H distances of 0.98Å. For 809 parameters final  $R$  indices of  $R_1 = 0.0360$  and  $wR^2 = 0.0900$  (GOF = 1.028) were obtained. The largest peak in a difference Fourier map was  $0.807\text{e}\text{\AA}^{-3}$ .

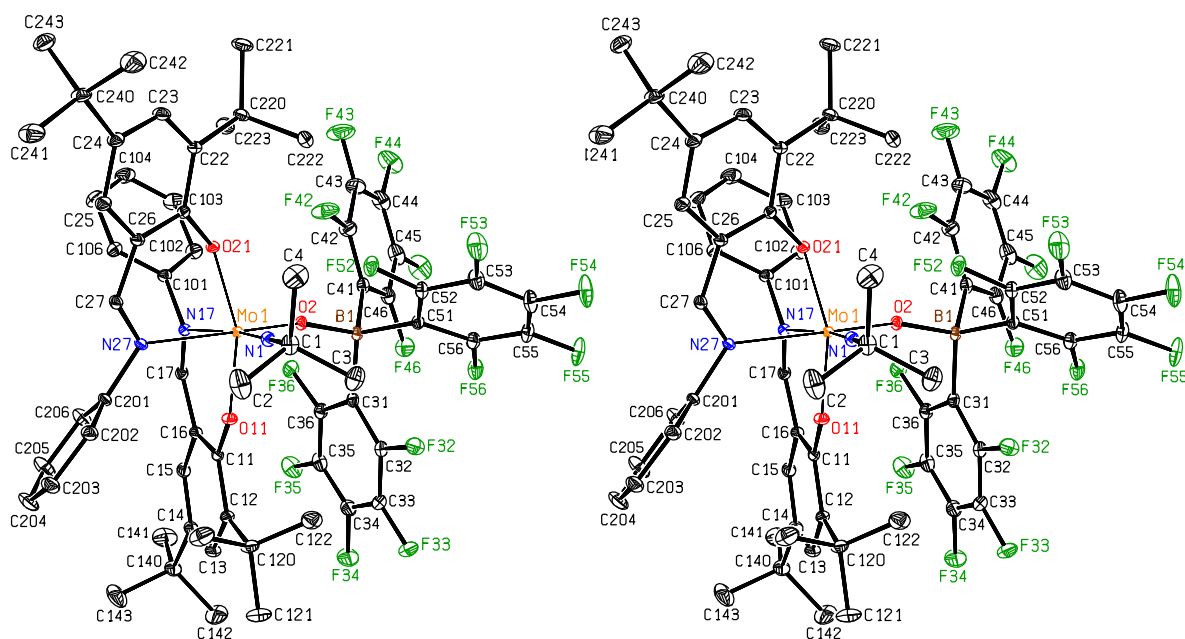

**Figure S45.** Stereoscopic ORTEP<sup>[5]</sup> plot of **2** showing the atomic numbering scheme. The probability ellipsoids are drawn at the 50% probability level. The H atoms were omitted for clarity reasons.

**Table S1.** Crystal data and structure refinement for **2** (CCDC deposition number: 1574332)**Crystal data**

|                                     |                                                            |
|-------------------------------------|------------------------------------------------------------|
| Empirical formula                   | $C_{64}H_{61}BF_{15}MoN_3O_3$                              |
| Formula weight                      | 1311.90                                                    |
| Crystal description                 | block, red                                                 |
| Crystal size                        | 0.32 x 0.19 x 0.18mm                                       |
| Crystal system, space group         | monoclinic, $P 2_1/n$                                      |
| Unit cell dimensions:               |                                                            |
| a                                   | 12.0188(14)Å                                               |
| b                                   | 26.298(3)Å                                                 |
| c                                   | 18.9156(19)Å                                               |
| $\beta$                             | 95.221(5)°                                                 |
| Volume                              | 5953.8(11)Å <sup>3</sup>                                   |
| Z                                   | 4                                                          |
| Calculated density                  | 1.464Mg/m <sup>3</sup>                                     |
| F(000)                              | 2688                                                       |
| Linear absorption coefficient $\mu$ | 0.316mm <sup>-1</sup>                                      |
| Absorption correction               | semi-empirical from equivalents                            |
| Max. and min. transmission          | 1.000 and 0.841                                            |
| Unit cell determination             | 2.48° < $\Theta$ < 33.67°<br>9805 reflections used at 100K |

**Data collection**

|                                       |                                 |
|---------------------------------------|---------------------------------|
| Temperature                           | 100K                            |
| Diffractometer                        | Bruker APEX-II CCD              |
| Radiation source                      | Incoatec microfocus sealed tube |
| Radiation and wavelength              | MoK $\alpha$ , 0.71073Å         |
| Monochromator                         | multilayer monochromator        |
| Scan type                             | $\phi$ and $\omega$ scans       |
| $\Theta$ range for data collection    | 1.87 to 33.00°                  |
| Reflections collected / unique        | 82751 / 22432                   |
| Significant unique reflections        | 17789 with $I > 2 \sigma(I)$    |
| R(int), R(sigma)                      | 0.0490, 0.0477                  |
| Completeness to $\Theta = 33.0^\circ$ | 100.0%                          |

**Refinement**

|                                       |                                                                        |
|---------------------------------------|------------------------------------------------------------------------|
| Refinement method                     | Full-matrix least-squares on $F^2$                                     |
| Data / parameters / restraints        | 22432 / 809 / 0                                                        |
| Goodness-of-fit on $F^2$              | 1.028                                                                  |
| Final R indices [ $I > 2\sigma(I)$ ]  | R1 = 0.0360, wR2 = 0.0831                                              |
| R indices (all data)                  | R1 = 0.0515, wR2 = 0.0900                                              |
| Extinction expression                 | none                                                                   |
| Weighting scheme                      | $w = 1/[\sigma^2(F_o^2) + (aP)^2 + bP]$ where $P = (F_o^2 + 2F_c^2)/3$ |
| Weighting scheme parameters a, b      | 0.0357, 2.7963                                                         |
| Largest $\Delta/\sigma$ in last cycle | 0.002                                                                  |
| Largest difference peak and hole      | 0.807 and -0.546e/Å <sup>3</sup>                                       |
| Structure Solution Program            | SHELXS-97 (Sheldrick, 2008)                                            |
| Structure Refinement Program          | SHELXL-2014/6 (Sheldrick, 2015)                                        |

**Table S2.** Selected bond lengths [Å] and angles [°] for **2**.

|                    |            |
|--------------------|------------|
| Mo(1)–N(1)         | 1.7259(12) |
| Mo(1)–O(2)         | 1.8221(9)  |
| Mo(1)–O(11)        | 1.9583(10) |
| Mo(1)–O(21)        | 1.9570(9)  |
| Mo(1)–N(17)        | 2.3140(12) |
| Mo(1)–N(27)        | 2.2957(11) |
| O(2)–B(1)          | 1.5002(16) |
|                    |            |
| O(11)–Mo(1)–O(21)  | 158.63(4)  |
| N(1)–Mo(1)–N(17)   | 170.36(5)  |
| O(2)–Mo(1)–N(27)   | 165.81(4)  |
| B(1)–O(2)–Mo(1)    | 162.72(9)  |
| C(1)–N(1)–Mo(1)    | 175.08(10) |
| C(11)–O(11)–Mo(1)  | 138.36(9)  |
| C(17)–N(17)–C(101) | 115.06(11) |
| C(17)–N(17)–Mo(1)  | 123.44(9)  |
| C(101)–N(17)–Mo(1) | 120.37(8)  |
| C(21)–O(21)–Mo(1)  | 134.49(8)  |
| C(27)–N(27)–C(201) | 112.55(11) |
| C(27)–N(27)–Mo(1)  | 121.04(9)  |
| C(201)–N(27)–Mo(1) | 125.69(8)  |

---

**Crystal structure determination of 4b.** The structure was solved by direct methods (SHELXS-97)<sup>[3]</sup> and refined by full-matrix least-squares techniques against  $F^2$  (SHELXL-2014/6).<sup>[4]</sup> The n-pentane molecules are disordered over two orientations and were refined with site occupation factors of 0.5. The C–C bonds in these solvent molecules were restrained to 1.53 Å and the same anisotropic displacement parameters were used for the C atoms. The other non-hydrogen atoms were refined with anisotropic displacement parameters without any constraints. The H atoms of the aromatic rings as well as those of the imino groups were put at the external bisectors of the C–C–C angles at C–H distances of 0.95 Å and common isotropic displacement parameters were refined for the H atoms of the same ring including the H atom of the adjacent imino group. The H atoms of the *tert*-butyl groups were refined with common isotropic displacement parameters for the H atoms of the same group and idealized geometries with tetrahedral angles, enabling rotation around the C–C bonds, and C–H distances of 0.98 Å. The H atoms of the solvent molecules were included with idealized geometries and their isotropic displacement parameters fixed to 1.2 times  $U_{eq}$  of the C atom they are bonded to. For 1027 parameters final  $R$  indices of  $R1 = 0.0434$  and  $wR^2 = 0.1283$  (GOF = 1.038) were obtained. The largest peak in a difference Fourier map was  $0.669e^{-3}$ .

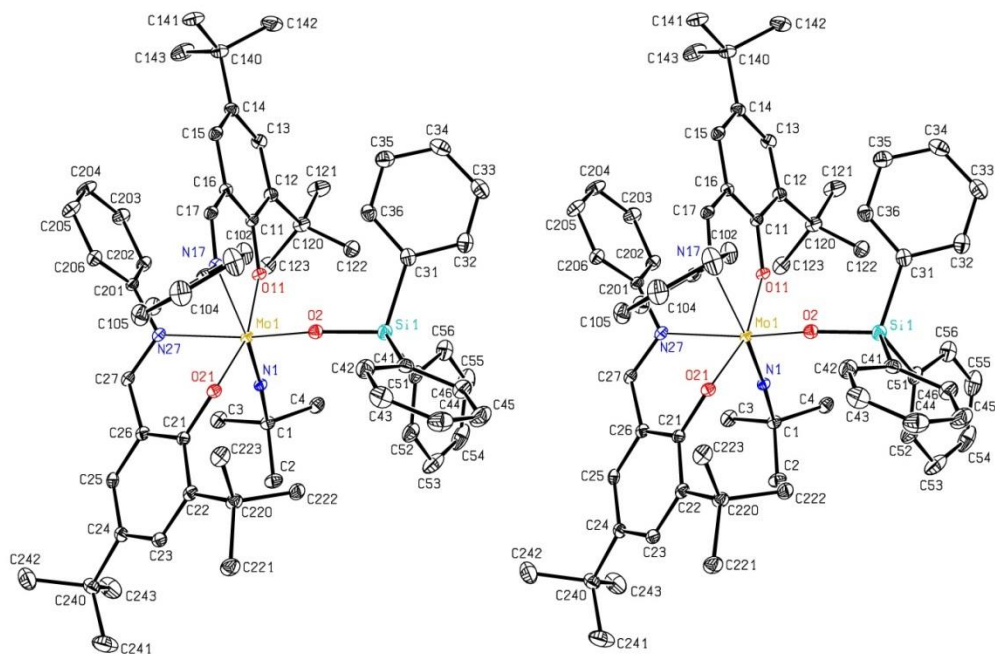

**Figure S46.** Stereoscopic ORTEP<sup>[5]</sup> plot of the complex cation found in **4b** showing the atomic numbering scheme. The probability ellipsoids are drawn at the 30% probability level. The H atoms were omitted for clarity reasons.

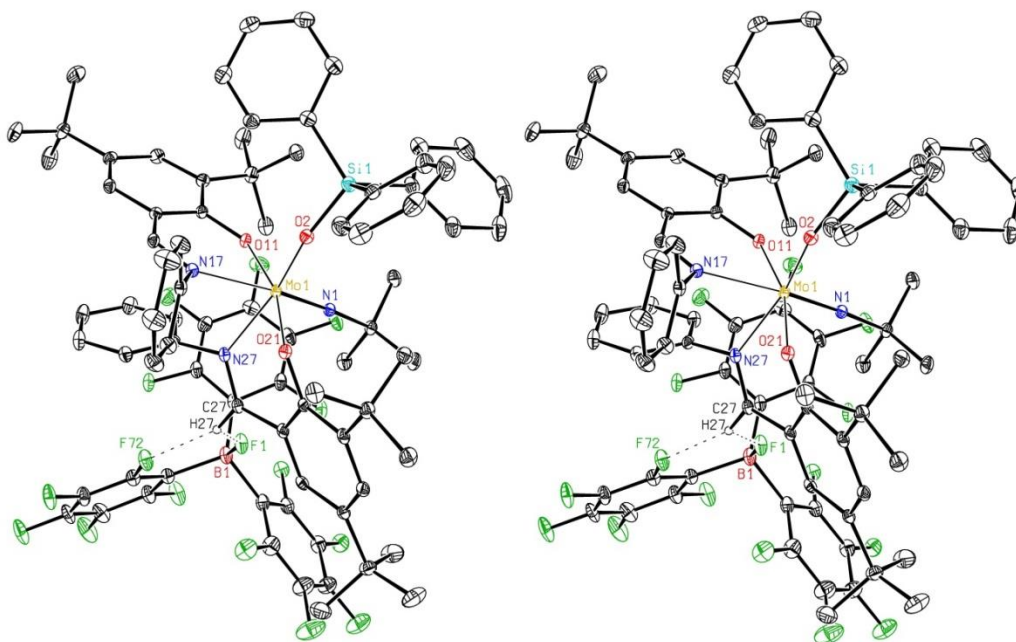

**Figure S47.** Stereoscopic ORTEP<sup>[5]</sup> plot of **4b** showing the atomic numbering scheme. The probability ellipsoids are drawn at the 30% probability level. H27 is drawn with an arbitrary radius; the other H atoms were omitted for clarity.

**Table S3.** Crystal data and structure refinement for **4b** (CCDC deposition number: 1574333)**Crystal data**

|                                 |                                                            |
|---------------------------------|------------------------------------------------------------|
| Empirical formula               | $C_{64}H_{76}MoN_3O_3Si^+ C_{18}BF_{16}^- \cdot C_5H_{12}$ |
| Formula weight                  | 1662.44                                                    |
| Crystal description             | plate, amber                                               |
| Crystal size                    | 0.30 x 0.26 x 0.03mm                                       |
| Crystal system, space group     | monoclinic, P 2 <sub>1</sub> /c                            |
| Unit cell dimensions:           |                                                            |
| a                               | 13.3781(10)Å                                               |
| b                               | 36.228(3)Å                                                 |
| c                               | 18.4909(13)Å                                               |
| β                               | 97.748(3)°                                                 |
| Volume                          | 8880.0(12)Å <sup>3</sup>                                   |
| Z                               | 4                                                          |
| Calculated density              | 1.243Mg/m <sup>3</sup>                                     |
| F(000)                          | 3440                                                       |
| Linear absorption coefficient μ | 0.241mm <sup>-1</sup>                                      |
| Absorption correction           | semi-empirical from equivalents                            |
| Max. and min. transmission      | 1.000 and 0.839                                            |
| Unit cell determination         | 2.31° < Θ < 25.52°<br>9947 reflections used at 100K        |

**Data collection**

|                                |                                 |
|--------------------------------|---------------------------------|
| Temperature                    | 100K                            |
| Diffractometer                 | Bruker APEX-II CCD              |
| Radiation source               | Incoatec microfocus sealed tube |
| Radiation and wavelength       | MoK <sub>α</sub> , 0.71073Å     |
| Monochromator                  | multilayer monochromator        |
| Scan type                      | φ and ω scans                   |
| Θ range for data collection    | 1.86 to 25.00°                  |
| Reflections collected / unique | 50857 / 15605                   |
| Significant unique reflections | 11678 with I > 2σ(I)            |
| R(int), R(sigma)               | 0.0368, 0.0601                  |
| Completeness to Θ = 25.0°      | 99.9%                           |

**Refinement**

|                                   |                                                                                                                                                      |
|-----------------------------------|------------------------------------------------------------------------------------------------------------------------------------------------------|
| Refinement method                 | Full-matrix least-squares on F <sup>2</sup>                                                                                                          |
| Data / parameters / restraints    | 15605 / 1027 / 14                                                                                                                                    |
| Goodness-of-fit on F <sup>2</sup> | 1.038                                                                                                                                                |
| Final R indices [I > 2σ(I)]       | R1 = 0.0434, wR2 = 0.1170                                                                                                                            |
| R indices (all data)              | R1 = 0.0663, wR2 = 0.1283                                                                                                                            |
| Extinction expression             | none                                                                                                                                                 |
| Weighting scheme                  | w = 1/[σ <sup>2</sup> (F <sub>o</sub> <sup>2</sup> )+(aP) <sup>2</sup> +bP] where P = (F <sub>o</sub> <sup>2</sup> +2F <sub>c</sub> <sup>2</sup> )/3 |
| Weighting scheme parameters a, b  | 0.0691, 1.9520                                                                                                                                       |
| Largest Δ/σ in last cycle         | 0.001                                                                                                                                                |
| Largest difference peak and hole  | 0.669 and -0.404e/Å <sup>3</sup>                                                                                                                     |
| Structure Solution Program        | SHELXS-97 (Sheldrick, 2008)                                                                                                                          |
| Structure Refinement Program      | SHELXL-2014/6 (Sheldrick, 2015)                                                                                                                      |

**Table S4.** Selected bond lengths [Å] and angles [°] for **4b**.

|                    |            |
|--------------------|------------|
| Mo(1)–N(1)         | 1.715(2)   |
| Mo(1)–O(2)         | 1.8975(19) |
| Mo(1)–O(11)        | 1.9391(18) |
| Mo(1)–O(21)        | 1.9365(18) |
| Mo(1)–N(17)        | 2.315(2)   |
| Mo(1)–N(27)        | 2.214(2)   |
| N(1)–C(1)          | 1.470(4)   |
| O(2)–Si(1)         | 1.630(2)   |
| O(11)–C(11)        | 1.344(3)   |
| C(17)–N(17)        | 1.291(3)   |
| O(21)–C(21)        | 1.354(3)   |
| C(27)–N(27)        | 1.289(4)   |
| B(1)–F(1)          | 1.435(3)   |
| B(1)–C(61)         | 1.646(5)   |
| B(1)–C(71)         | 1.648(4)   |
| B(1)–C(81)         | 1.649(5)   |
| <br>               |            |
| O(11)–Mo(1)–O(21)  | 163.05(8)  |
| N(1)–Mo(1)–N(17)   | 170.64(9)  |
| O(2)–Mo(1)–N(27)   | 163.49(8)  |
| C(1)–N(1)–Mo(1)    | 175.60(19) |
| Si(1)–O(2)–Mo(1)   | 155.54(12) |
| C(11)–O(11)–Mo(1)  | 143.05(17) |
| C(17)–N(17)–C(101) | 114.2(2)   |
| C(17)–N(17)–Mo(1)  | 125.59(18) |
| C(101)–N(17)–Mo(1) | 120.03(17) |
| C(21)–O(21)–Mo(1)  | 125.99(16) |
| C(27)–N(27)–C(201) | 115.8(2)   |
| C(27)–N(27)–Mo(1)  | 121.15(17) |
| C(201)–N(27)–Mo(1) | 123.04(18) |

---

## References

- [1] N. Zwettler, N. Grover, F. Belaj, K. Kirchner, N. C. Mösch-Zanetti, *Inorg. Chem.* **2017**, *56*(17), 10147–10150.
- [2] M. H. Holthausen, T. Mahdi, C. Schleppehorst, L. J. Hounjet, J. J. Weigand, D. W. Stephan, *Chem. Commun.* **2014**, *50*(70), 10038–10040.
- [3] G. M. Sheldrick, *Acta Crystallogr, A* **2008**, *64*(Pt 1), 112–122.
- [4] G. M. Sheldrick, *Acta Crystallogr, C* **2015**, *71*(Pt 1), 3–8.
- [5] C. K. Johnson, *ORTEP. Report ORNL-3794*, Tennessee, USA, **1965**.
